# Supplementary material for: Cryo-EM analyses of dimerized spliceosomes provide new insights into the functions of B complex proteins
Source: Springer Nature journal article supplement (doi:10.1038/s44318-024-00052-1), 2024-02-21
Supplement: MOESM1 [file 44318_2024_52_moesm1_esm.pdf › 44318_2024_52_moesm1_esm.pdf]

## Table of Contents

|                                 |           |
|---------------------------------|-----------|
| <b>Appendix Figure S1 .....</b> | <b>2</b>  |
| <b>Appendix Table S1 .....</b>  | <b>4</b>  |
| <b>Appendix Table S2 .....</b>  | <b>7</b>  |
| <b>Appendix Table S3 .....</b>  | <b>10</b> |
| <b>Appendix Table S4 .....</b>  | <b>11</b> |
| <b>Appendix Table S5 .....</b>  | <b>13</b> |
| <b>References .....</b>         | <b>14</b> |

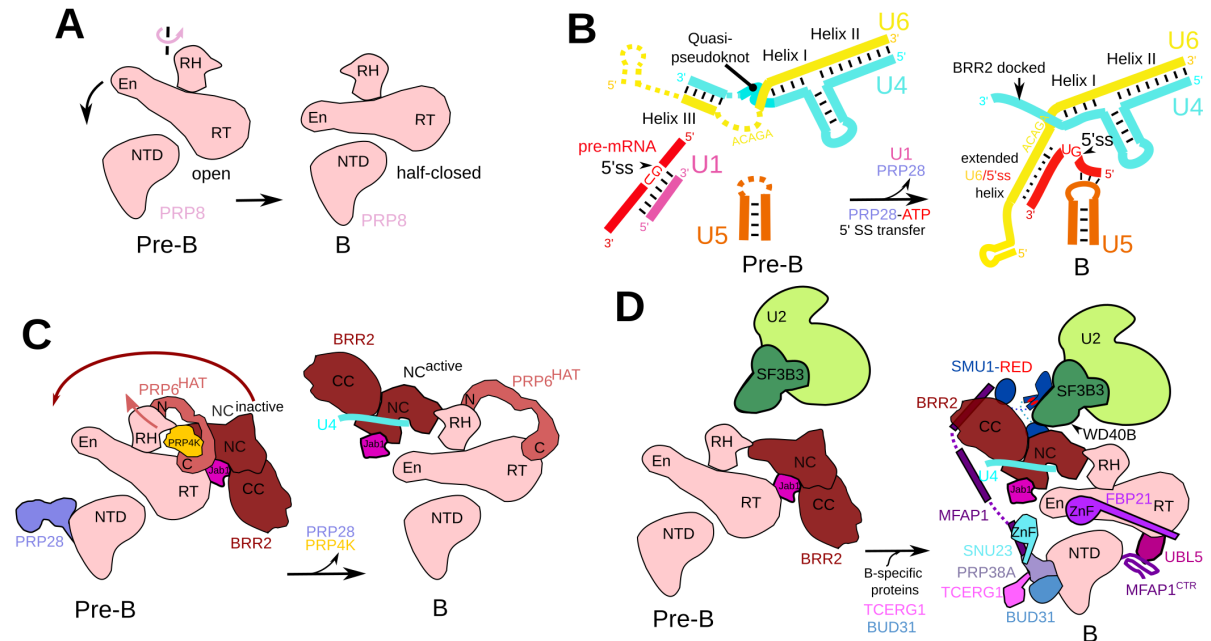

### Appendix Figure S1. Structural changes during the spliceosomal pre-B to B complex transition.

**A.** Cartoon of the conformational change in PRP8 during the transformation of the pre-B complex into B. For simplicity only selected PRP8 domains are shown. Movement of the PRP8 endonuclease-like (En) domain (indicated by an arrow) toward the PRP8 N-terminal domain (NTD) converts the PRP8 open conformation to a half-closed one in the B complex. During the pre-B to B transition, the PRP8 RNase H (RH) domain also rotates ca 180 degrees. RT, reverse transcriptase-like domain. **B.** Schematic showing the rearrangements in the U4/U6 RNA-RNA network and the transfer of the 5'ss from U1 to U6 during B complex formation. In the pre-B complex, the 5' end of the U1 snRNA base pairs with nucleotides at or adjacent to the 5'ss GU dinucleotide. During B complex formation, the DEAD-box helicase PRP28 disrupts the U1/5'ss interaction and facilitates the handover of the 5'ss to the U6 snRNA, leading to formation of an extended U6/5'ss helix. At the same time, nucleotides in loop 1 of the U5 snRNA base pair with pre-mRNA nucleotides directly upstream of the 5'ss GU at the 3' end of the 5' exon. See Fig. EV1H for a more comprehensive depiction of the RNA-RNA network in the human B complex. In the human pre-B complex, the U4 and U6 snRNAs, not only are extensively base-paired via helix I and II, but also form an additional helix (U4/U6 helix III) and the U4 snRNA forms a so-called quasi-pseudoknot. During B complex formation the latter and U4/U6 helix III are disrupted, and U6 nucleotides involved in helix III formation now form part of the extended U6/5'ss helix. **C.** Cartoon showing the large-scale translocation of the BRR2 helicase domain, comprised of an N-terminal helicase cassette (NC) and C-terminal helicase cassette (CC), during B complex formation. The BRR2 helicase domain is translocated from its position close to the PRP8 reverse transcriptase-like domain in pre-B to the PRP8 endonuclease-like domain in the B complex. In pre-B, the U4 snRNA binding site in the RecA1 and RecA2 domains of the BRR2 N-terminal cassette is blocked by the C-terminal tail of PRP8. In the B complex, the U4 snRNA has bound the RecA domains, leading to an active BRR2

conformation, but additional mechanisms involving other B complex proteins prevent BRR2 from unwinding the U4/U6 helices. The N-terminal HAT repeats of PRP6 are also repositioned during the transformation of pre-B to B, which potentially is triggered by PRP6 phosphorylation by PRP4 kinase (PRP4K). **D.** The B-specific proteins are recruited, together with TCERG1 and BUD13, during B-complex formation. See Appendix Table S1, for a description of the roles of the B-specific proteins in the B complex. The structural rearrangements and compositional changes described in the legend are based on this study and previous cryo-EM studies elucidating the structure of the human pre-B and B complexes (Bertram *et al*, 2017; Charenton *et al*, 2019; Zhan *et al*, 2018).

**Appendix Table S1. Roles of the B-specific and other selected proteins in the human B complex.** The roles of the listed proteins are based primarily on this study and previous cryo-EM studies of the human B complex (Bertram *et al*, 2017; Zhan *et al*, 2018).

|              |                                                                                                                                                                                                                                                                                                                                                                                                                                                                                                                                                                                                                                                                                                |
|--------------|------------------------------------------------------------------------------------------------------------------------------------------------------------------------------------------------------------------------------------------------------------------------------------------------------------------------------------------------------------------------------------------------------------------------------------------------------------------------------------------------------------------------------------------------------------------------------------------------------------------------------------------------------------------------------------------------|
| SMU1         | Bridges BRR2 and SF3B3, and helps to stabilize BRR2's new position after its translocation. It also bridges the two B complex protomers at their interface in the B dimer.                                                                                                                                                                                                                                                                                                                                                                                                                                                                                                                     |
| RED          | Based on crosslinks, RED latches onto U2 proteins and PRP8, including the PRP8 N-terminal domain (NTD), likely stabilizing the U2 snRNP interaction with the tri-snRNP.                                                                                                                                                                                                                                                                                                                                                                                                                                                                                                                        |
| PRP38        | Acts as a binding hub for the B-specific proteins MFAP1 and SNU23, and tethers them to the PRP8 NTD. PRP38 and associated proteins help to stabilize the half-closed conformation of PRP8.                                                                                                                                                                                                                                                                                                                                                                                                                                                                                                     |
| SNU23        | Stabilizes the extended part of the U6/5'ss helix by direct contacts or indirectly via interacting with the PRP8 RH-Jab1 linker. SNU23 interacts with the BRR2 N-terminal helicase cassette (BRR2 <sup>NC</sup> ) and tethers it to the U6/5'ss helix.                                                                                                                                                                                                                                                                                                                                                                                                                                         |
| FBP21        | Binds to the U6/5'ss helix via its zinc finger and to the RecA2 domain of BRR2 <sup>NC</sup> via its N-terminal $\alpha$ -helix, and thereby likely inhibits BRR2's movement towards U4/U6 helix I. It also binds via its C-terminal region to BRR2's C-terminal helicase cassette, thereby inhibiting BRR2's helicase activity.                                                                                                                                                                                                                                                                                                                                                               |
| MFAP1 & UBL5 | MFAP1 bridges via a long $\alpha$ -helix <sup>291-313</sup> to PRP38, and SNU23, via $\alpha$ -helix <sup>215-255</sup> to BRR2 <sup>NC</sup> and via $\alpha$ -helix <sup>142-166</sup> to the WD40 domain of SMU1B, thereby likely stabilizing BRR2 in its new position after translocation. Based on crosslinks, the N-terminal region latches on U2 SF3B1, thus MFAP1 connects SMU1, BRR2 and the 5' domain of U2 with the RNP core of the B complex. A large part of MFAP1's C-terminal region (aa 215-393) forms a globular domain that binds UBL5, and together with it, forms a 5' exon- binding channel. Both proteins also stabilize the 5' exon/U5 loop 1 base pairing interaction. |
| DIM1         | The U5 protein DIM1 recognizes the 5'ss nucleotide U+2. It also contacts, together with FBP21, U6 nts 47-48. As these U6 nts stabilize the quasi-pseudoknot structure of U4 nts 63-68 in the U4/U6.U5 tri-snRNP, DIM1 may thus help to dissolve the quasi-pseudoknot structure of U4 during the pre-B to B transition.                                                                                                                                                                                                                                                                                                                                                                         |
| TCERG1       | The six C-terminal FF domains of TCERG1 act as a brace contacting the PRP8 reverse transcriptase-like (RT) domain, SNU114 and, in conjunction with BUD31, the 5' end of U6 snRNA, likely stabilizing this part of the B complex during the BRR2-mediated remodeling of the spliceosome.                                                                                                                                                                                                                                                                                                                                                                                                        |

|       |                                                                                                                                                                                                                                                                                                                                                                                                                                                                                                                                                                                                                                                                                                                                                                                |
|-------|--------------------------------------------------------------------------------------------------------------------------------------------------------------------------------------------------------------------------------------------------------------------------------------------------------------------------------------------------------------------------------------------------------------------------------------------------------------------------------------------------------------------------------------------------------------------------------------------------------------------------------------------------------------------------------------------------------------------------------------------------------------------------------|
| PRP8  | Acts as a large scaffold that binds numerous B complex proteins and RNA regions. The PRP8 NTD clamps the major stems of the U5 snRNA and stably interacts with SNU114. It also provides docking sites for the extended U6/5'ss helix, and for the PRP38/SNU23/MFAP1 protein complex, as well as BUD13 and the TCERG1 FF1 domain. The PRP8 En domain interacts with the PRP8 Jab1 domain, which in turn stably docks to the N-terminal helicase cassette of BRR2. The PRP8 RH domain interacts with BRR2, SNU66 and the N-terminal HAT domain of PRP6. Amino acid side chains of two loops of the PRP8 Linker region recognize the 5'ss nucleotides G+1 and G-1. The PRP8 helical bundle binds DIM1. Several regions of the PRP8 Large domain interact with U4/U6 RNP proteins. |
| BRR2  | A DEXH-box RNA helicase that unwinds the U4/U6 helix during B <sup>act</sup> formation. The RecA domains of the N-terminal helicase cassette bind a single stranded region of the U4 snRNA directly upstream of the U4/U6 helix 1.                                                                                                                                                                                                                                                                                                                                                                                                                                                                                                                                             |
| PRP6  | The PRP6 HAT domain bridges the U4/U6 and U5 snRNPs; that is, the C-terminal HAT repeats bind to the U4/U6 proteins PRP4, SNU13, PRP3 and PRP31, while the N-terminal-most TPR repeats interact with the PRP8 RH and RT domains. The "elbow region" within the N-terminal HAT domain, together with the SNU66 $\alpha$ -helix <sup>200-219</sup> forms part of the central dimerization interface of the two protomers in the B dimer.                                                                                                                                                                                                                                                                                                                                         |
| PRP4  | The PRP4 WD40 domain bridges the U4/U6 proteins SNU13 and PRP6, as well as the C-terminal ferredoxin-like domain of PRP3. The N-terminal helical bundle of PRP4 binds PPIH, BRR2, and the central region of SF3A1.                                                                                                                                                                                                                                                                                                                                                                                                                                                                                                                                                             |
| SNU66 | Several N-terminally-located $\alpha$ -helices of SNU66 connect the N-terminal HAT domain of PRP6 with the PRP8 RT, RH and NTD domains, and likely stabilize these domains in the B complex after their rearrangements during the pre-B to B transition.                                                                                                                                                                                                                                                                                                                                                                                                                                                                                                                       |
| PPIH  | PPIH binds to the N-terminal region of PRP4 and provides a major docking site for the long N-terminal $\alpha$ -helix of FBP21. It also contacts PRP3.                                                                                                                                                                                                                                                                                                                                                                                                                                                                                                                                                                                                                         |
| SF3B1 | The SF3B1 HEAT domain clamps the extended U2/BS helix and acts as a binding platform for several other SF3b complex proteins.                                                                                                                                                                                                                                                                                                                                                                                                                                                                                                                                                                                                                                                  |
| SF3B6 | The SF3B6 RRM is bound at the C-terminal region of the SF3B1 HEAT domain and is located near U2/U6 helix II.                                                                                                                                                                                                                                                                                                                                                                                                                                                                                                                                                                                                                                                                   |
| SF3A1 | SF3A1 connects the U2 snRNP with the tri-snRNP core via its central tri-snRNP-interacting region comprised of amino acids 409-489. This region contains three $\alpha$ -helices that dock to PRP4's N-terminal helical bundle and PPIH, bind to the 5' stem-loop of U4 snRNA, and interact via its most C-terminally located $\alpha$ -helix with the U5 protein DIM1.                                                                                                                                                                                                                                                                                                                                                                                                         |

|       |                                                                                                                                                                                                                                                                                     |
|-------|-------------------------------------------------------------------------------------------------------------------------------------------------------------------------------------------------------------------------------------------------------------------------------------|
| SF3A2 | The SF3A2 $\beta$ -sandwich domain and the SF3B4 RRM1 domain chaperon the intron region directly upstream of nucleotides forming the branch site helix. Based on crosslinks, the $\beta$ -sandwich domain may also function as a docking site for the RRM1 of the hnRNP A1 protein. |
|-------|-------------------------------------------------------------------------------------------------------------------------------------------------------------------------------------------------------------------------------------------------------------------------------------|

**Appendix Table S2. Protein composition of hB complexes.** Proteins were identified by nano UHPLC-ESI MS with at least 2 unique peptides (peptide FDR 0.05%). PSM stands for peptide-spectrum match. The 90 most abundant proteins are shown as judged from a ratio of PSMs to protein molecular weight. PSMs are the sum of three technical replicates. Asterisk marks the recombinant protein used for affinity purification of hB.

| Name                  | Uniprot AC | kDa   | Gene name | PSMs  |
|-----------------------|------------|-------|-----------|-------|
| <b>Sm proteins</b>    |            |       |           |       |
| SMB/B'                | P14678     | 24.6  | SNRPB     | 1856  |
| SMD1                  | P62314     | 13.3  | SNRPD1    | 880   |
| SMD2                  | P62316     | 13.5  | SNRPD2    | 1038  |
| SMD3                  | P62318     | 13.9  | SNRPD3    | 1419  |
| SME                   | P62304     | 10.8  | SNRPE     | 1293  |
| SMF                   | P62306     | 9.7   | SNRPF     | 504   |
| SMG                   | P62308     | 8.5   | SNRPG     | 593   |
| <b>U1 snRNP</b>       |            |       |           |       |
| U1-70K                | P08621     | 51.6  | SNRNP70   | 1590  |
| U1-A                  | P09012     | 31.3  | SNRPA     | 1018  |
| U1-C                  | P09234     | 17.4  | SNRPC     | 381   |
| <b>17S U2 snRNP</b>   |            |       |           |       |
| U2A'                  | P09661     | 28.4  | SNRPA1    | 1466  |
| U2B''                 | P08579     | 25.5  | SNRPB2    | 1407  |
| SF3A1                 | Q15459     | 88.9  | SF3A1     | 3344  |
| SF3A2                 | Q15428     | 49.3  | SF3A2     | 1285  |
| SF3A3                 | Q12874     | 58.9  | SF3A3     | 3137  |
| SF3B1                 | O75533     | 145.8 | SF3B1     | 7278  |
| SF3B2                 | Q13435     | 100.2 | SF3B2     | 5545  |
| SF3B3                 | Q15393     | 135.6 | SF3B3     | 6896  |
| SF3B4                 | Q15427     | 44.4  | SF3B4     | 1321  |
| SF3B5                 | Q9BWJ5     | 10.1  | SF3B5     | 1130  |
| SF3B6                 | Q9Y3B4     | 14.6  | SF3B6     | 465   |
| PHF5A                 | Q7RTV0     | 12.4  | PHF5A     | 390   |
| <b>17S U2 related</b> |            |       |           |       |
| DDX42                 | Q86XP3     | 103.0 | DDX42     | 4409  |
| DHX15                 | O43143     | 90.9  | DHX15     | 3912  |
| PUF60                 | Q9UHX1     | 59.9  | PUF60     | 1765  |
| SPF30                 | O75940     | 26.7  | SMNDC1    | 592   |
| U2AF35                | Q01081     | 27.9  | U2AF1     | 1838  |
| U2AF65                | P26368     | 53.5  | U2AF2     | 3683  |
| <b>U5 snRNP</b>       |            |       |           |       |
| PRP8                  | Q6P2Q9     | 273.6 | PRPF8     | 16978 |
| BRR2                  | O75643     | 244.5 | SNRNP200  | 17266 |
| SNU114                | Q15029     | 109.4 | EFTUD2    | 9283  |

| Name                        | Uniprot AC | kDa   | Gene name | PSMs |
|-----------------------------|------------|-------|-----------|------|
| U5-40K                      | Q96DI7     | 39.3  | SNRNP40   | 3589 |
| PRP6 (102K)                 | O94906     | 106.9 | PRPF6     | 3471 |
| DIM1 (15K)                  | P83876     | 16.8  | TXNL4A    | 892  |
| <b>LSm proteins</b>         |            |       |           |      |
| LSM2                        | Q9Y333     | 10.8  | LSM2      | 727  |
| LSM3                        | P62310     | 11.8  | LSM3      | 622  |
| LSM4                        | Q9Y4Z0     | 15.4  | LSM4      | 610  |
| LSM5                        | Q9Y4Y9     | 9.9   | LSM5      | 207  |
| LSM6                        | P62312     | 9.1   | LSM6      | 261  |
| LSM7                        | Q9UK45     | 11.6  | LSM7      | 478  |
| LSM8                        | O95777     | 10.4  | LSM8      | 725  |
| <b>U4/U6 snRNP</b>          |            |       |           |      |
| PRP3                        | O43395     | 77.6  | PRPF3     | 3158 |
| PRP4                        | O43172     | 58.5  | PRPF4     | 3200 |
| PPIH (20K)                  | O43447     | 19.2  | PPIH      | 912  |
| PRP31                       | Q8WWY3     | 55.5  | PRPF31    | 2088 |
| NHP2L1 (15.5K)              | P55769     | 14.2  | SNU13     | 358  |
| <b>U4/U6.U5 tri-snRNP</b>   |            |       |           |      |
| SNU66                       | O43290     | 90.3  | SART1     | 3688 |
| SAD1                        | Q53GS9     | 65.4  | USP39     | 1590 |
| <b>B-specific proteins</b>  |            |       |           |      |
| FBP21                       | O75554     | 42.5  | WBP4      | 944  |
| MFAP1                       | P55081     | 52.0  | MFAP1     | 1181 |
| NPW38BP                     | Q9Y2W2     | 70.0  | WBP11     | 1974 |
| PQBP1                       | O60828     | 30.5  | PQBP1     | 1059 |
| PRP38A                      | Q8NAV1     | 37.5  | PRPF38A   | 1543 |
| RED                         | Q13123     | 65.6  | IK        | 2572 |
| SMU1 (fSAP57)               | Q2TAY7     | 57.5  | SMU1      | 4133 |
| SNU23 (ZMAT2)               | Q96NC0     | 23.6  | ZMAT2     | 968  |
| UBL5                        | Q9BZL1     | 8.5   | UBL5      | 387  |
| <b>Cap binding complex</b>  |            |       |           |      |
| NCBP1                       | Q09161     | 91.8  | NCBP1     | 6135 |
| NCBP2                       | P52298     | 18.0  | NCBP2     | 557  |
| <b>SR proteins</b>          |            |       |           |      |
| SRSF1                       | Q07955     | 27.8  | SRSF1     | 2242 |
| SRSF2                       | Q01130     | 25.5  | SFRS2     | 736  |
| SRSF3                       | P84103     | 19.3  | SFRS3     | 566  |
| SRSF7                       | Q16629     | 27.4  | SRSF7     | 670  |
| <b>hnRNP</b>                |            |       |           |      |
| HNRNPA1                     | P09651     | 38.7  | HNRNPA1   | 2365 |
| HNRNPA2/B1                  | P22626     | 37.4  | HNRPA2B1  | 1389 |
| HNRNPA3                     | P51991     | 39.6  | HNRNPA3   | 834  |
| <b>hPRP19/CDC5L complex</b> |            |       |           |      |



| Name                                | Uniprot AC | kDa   | Gene name | PSMs  |
|-------------------------------------|------------|-------|-----------|-------|
| PRP19                               | Q9UMS4     | 55.2  | PRPF19    | 4711  |
| CDC5L                               | Q99459     | 92.2  | CDC5L     | 2869  |
| SPF27                               | O75934     | 26.0  | BCAS2     | 1001  |
| PLRG1                               | O43660     | 57.2  | PLRG1     | 2116  |
| CTNNBL1                             | Q8WYA6     | 65.1  | CTNNBL1   | 2029  |
| <b>hPRP19/CDC5L related</b>         |            |       |           |       |
| BUD31                               | P41223     | 17.0  | BUD31     | 774   |
| SKIP                                | Q13573     | 61.5  | SNW1      | 1471  |
| SYF2                                | O95926     | 28.7  | SYF2      | 581   |
| <b>Intron binding complex (IBC)</b> |            |       |           |       |
| AQR                                 | O60306     | 171.3 | AQR       | 4283  |
| ISY1                                | Q9ULR0     | 33.0  | KIAA1160  | 773   |
| SYF1                                | Q9HCS7     | 100.0 | XAB2      | 2340  |
| <b>Other spliceosomal proteins</b>  |            |       |           |       |
| TCERG1 (CA150)                      | O14776     | 123.9 | TCERG1    | 2960  |
| BUB3                                | O43684     | 37.2  | BUB3      | 1056  |
| CCAR1 (FLJ10839)                    | Q8IX12     | 132.8 | CCAR1     | 3004  |
| CCDC12                              | Q8WUD4     | 19.2  | CCDC12    | 455   |
| ERH                                 | P84090     | 12.3  | ERH       | 254   |
| FUS                                 | P35637     | 53.4  | FUS       | 1163  |
| PPWD1 (KIAA0073)                    | Q96BP3     | 73.6  | PPWD1     | 1535  |
| PRP38B                              | Q5VTL8     | 64.5  | PRPF38B   | 1437  |
| RBM39 (RNPC2, CAPER)                | Q14498     | 58.5  | RBM39     | 2236  |
| SMN                                 | P63162     | 24.6  | SNRPN     | 1838  |
| SRRT (ASR2B)                        | Q9BXP5     | 100.0 | SRRT      | 5284  |
| TRIR (fSAP18)                       | Q9BQ61     | 18.4  | TRIR      | 414   |
|                                     |            |       |           |       |
| MBP-MS2 (recombinant)*              |            | 56.9  |           | 11600 |

**Appendix Table S3 Cryo-EM data collection, refinement and validation statistics for hB complexes.**

|                                           | Human B complex                |                                                  |                                                |                            |
|-------------------------------------------|--------------------------------|--------------------------------------------------|------------------------------------------------|----------------------------|
|                                           | B complex dimer<br>(EMD-19063) | B complex protomer<br>(EMD-18529)<br>(PDB: 8QO9) | tri-snRNP region<br>(EMD-18225)<br>(PDB: 8Q7N) | BRR2 region<br>(EMD-19062) |
| Data collection and processing            |                                |                                                  |                                                |                            |
| Magnification                             | 120,700                        | 120,700                                          | 120,700                                        | 120,700                    |
| Voltage (kV)                              | 300                            | 300                                              | 300                                            | 300                        |
| Electron exposure (e-/Å <sup>2</sup> )    | 48                             | 48                                               | 48                                             | 48                         |
| Defocus range (μm)                        | 1-3                            | 1-3                                              | 1-3                                            | 1-3                        |
| Pixel size (Å)                            | 1.16                           | 1.16                                             | 1.16                                           | 1.16                       |
| Symmetry imposed                          | C1                             | C1                                               | C1                                             | C1                         |
| Initial particle images (no.)             | ~1 million                     | ~1 million                                       | ~1 million                                     | ~1 million                 |
| Final particle images (no.)               | 25,833                         | 50,321                                           | 251,564                                        | 251,564                    |
| Map resolution (Å)                        | 15.0                           | 5.3                                              | 3.1                                            | 4.2                        |
| FSC threshold                             | 0.143                          | 0.143                                            | 0.143                                          | 0.143                      |
| Map resolution range (Å)                  |                                |                                                  |                                                |                            |
| Tri-snRNP region                          | 15-20                          | 4.5-6                                            | 2.9-3.5                                        | ---                        |
| U2 region                                 | 20-30                          | 10-15                                            | 10-15                                          | ---                        |
| BRR2 region                               | 20-30                          | 10-15                                            | 8-15                                           | 4-8                        |
| Refinement                                |                                |                                                  |                                                |                            |
| Initial model used (PDB code)             | n/a                            | 6AHD                                             | 6AHD                                           | n/a                        |
| Model resolution (Å)                      | ---                            | ---                                              | 3.3                                            | ---                        |
| FSC threshold                             | ---                            | ---                                              | 0.5                                            | ---                        |
| Model resolution range (Å)                | ---                            | ---                                              | 3.3                                            | ---                        |
| Map sharpening B factor (Å <sup>2</sup> ) | ---                            | -200                                             | -104                                           | -215                       |
| Model composition                         |                                |                                                  |                                                |                            |
| Non-hydrogen atoms                        | ---                            | 87,345                                           | 56,046                                         | ---                        |
| Protein residues                          | ---                            | 15,647                                           | 6,666                                          | ---                        |
| Ligands                                   | ---                            | 0                                                | 0                                              | ---                        |
| B factors (Å <sup>2</sup> )               |                                |                                                  |                                                |                            |
| Protein                                   | ---                            | ---                                              | 76.03                                          | ---                        |
| Ligand                                    | ---                            | ---                                              | ---                                            | ---                        |
| R.m.s. deviations                         |                                |                                                  |                                                |                            |
| Bond lengths (Å)                          | ---                            | ---                                              | 0.0178                                         | ---                        |
| Bond angles (°)                           | ---                            | ---                                              | 1.44                                           | ---                        |
| Validation                                |                                |                                                  |                                                |                            |
| MolProbity score                          | ---                            | ---                                              | 1.88                                           | ---                        |
| Clashscore                                | ---                            | ---                                              | 7.43                                           | ---                        |
| Poor rotamers (%)                         | ---                            | ---                                              | 0.85                                           | ---                        |
| Ramachandran plot                         |                                |                                                  |                                                |                            |
| Favored (%)                               | ---                            | ---                                              | 92.41                                          | ---                        |
| Allowed (%)                               | ---                            | ---                                              | 7.42                                           | ---                        |
| Disallowed (%)                            | ---                            | ---                                              | 0.17                                           | ---                        |

**Appendix Table S4. Summary of modeled proteins and RNAs in hB complexes.**

| Sub-complexes  | Protein/RNA                              | Chain ID                   | UniProt ID                                             | Modeled Region/domain                            | Template   | modeling approach   |
|----------------|------------------------------------------|----------------------------|--------------------------------------------------------|--------------------------------------------------|------------|---------------------|
| U2 snRNP       | U2 snRNA                                 | 2                          | N.A.                                                   | 3-14; 33-65; 97-107; 147-184                     | 6AHD       | docked              |
|                |                                          |                            |                                                        | 29-32                                            | 7Q4O       | docked              |
|                | U2 A'                                    | 2A                         | P09661                                                 | 2-163                                            | 6FF7       | docked              |
|                | U2 B''                                   | 2B                         | P08579                                                 | 3-84                                             | 6FF7       | docked              |
|                | SF3B1                                    | B1                         | O75533                                                 | 457-1304                                         | 6FF7       | docked              |
|                |                                          |                            |                                                        | 394-415                                          | 7Q4O       | docked              |
|                | SF3B2                                    | B2                         | Q13435                                                 | 458-602 ; 604-667                                | 6FF7       | docked              |
|                | SF3B3                                    | B3                         | Q15393                                                 | 1-645 ; 663-691 ; 695-830 ; 834-1068 ; 1078-1217 | 6FF7       | docked              |
|                | SF3B4                                    | B4                         | Q15427                                                 | 12-89                                            | 6FF7       | docked              |
|                | SF3B5                                    | B5                         | Q9BWJ5                                                 | 12-80                                            | 6FF7       | docked              |
|                | SF3B6                                    | B6                         | Q9Y3B4                                                 | 12-101                                           | 7Q4O       | docked              |
|                | PHF5A                                    | BP                         | Q7RTV0                                                 | 2-101                                            | 6FF7       | docked              |
|                | SmB,D1,D2, D3,E,F,G                      | 2b, 21, 22, 23,2e, 2f, 2g  | P14678, P62314, P62316, P62318, P62304, P62306, P62308 | Sm fold                                          | 6FF7       | docked              |
| U4/U6 di-snRNP | SF3A1                                    | 7                          | Q15459                                                 | 160-282                                          | 6FF7       | docked              |
|                |                                          |                            |                                                        | 422-447; 455-473                                 | 6QX9       | docked and adjusted |
|                |                                          |                            |                                                        | 409-421; 448-454; 474-489                        | N.A.       | de novo modelling   |
|                | SF3A2                                    | 8                          | Q15428                                                 | 41-85 ; 104-126 ; 133-209                        | 6FF7       | docked              |
|                | SF3A3                                    | 9                          | Q12874                                                 | 1-229 ; 279-362 ; 393-462                        | 6FF7       | docked              |
|                | U4 snRNA                                 | 4                          | N.A.                                                   | 1-62; 68-96; 105-133; 138-145                    | 6AHD       | docked and adjusted |
|                | SmB,D1,D2, D3,E,F,G                      | 4b, 41, 42, 43, 4e, 4f, 4g | P14678, P62314, P62316, P62318, P62304, P62306, P62308 | Sm fold                                          | 6AHD       | docked              |
|                | U6 snRNA                                 | 6                          | N.A.                                                   | 1-78                                             | 6AHD       | docked and adjusted |
|                |                                          |                            |                                                        | 85-96; 102-105                                   | 6AHD       | docked              |
|                | LSm2, LSm3, LSm4, LSm5, LSm6, LSm7, LSm8 | 62, 63, 64, 65, 66, 67, 68 | Q9Y333, P62310, Q9Y4Z0, Q9Y4Y9, P62312, Q9UK45, O95777 | Sm fold                                          | 6AHD       | docked              |
|                | PRP3                                     | J                          | O43395                                                 | 385-395;412-427                                  | AlphaFold2 | docked              |
|                |                                          |                            |                                                        | 413-606; 627-683                                 | 6AHD       | docked and adjusted |
|                | PRP4                                     | F                          | O43172                                                 | 81-152; 164-522                                  | AlphaFold2 | docked and adjusted |
| Tri-snRNP      | PRP31                                    | L                          | Q8WWY3                                                 | 52-80; 86-347; 351-432                           | 6AHD       | docked and adjusted |
|                | PPIH                                     | W                          | O43447                                                 | 9-177                                            | 6AHD       | docked and adjusted |
|                | SNU13                                    | M                          | P55769                                                 | 5-128                                            | 6AHD       | docked and adjusted |
|                | SNU66                                    | S                          | O43290                                                 | 148-191; 198-219; 359-375                        | AlphaFold2 | docked and adjusted |
|                |                                          |                            |                                                        | 252-358                                          | AlphaFold2 | docked and adjusted |
|                | U5 snRNA                                 | 5                          | N.A.                                                   | 3-117                                            | 6AHD       | docked and adjusted |

|            |                        |                               |                                                                    |                                               |                                        |                                                      |
|------------|------------------------|-------------------------------|--------------------------------------------------------------------|-----------------------------------------------|----------------------------------------|------------------------------------------------------|
| U5 snRNP   | PRP8                   | A                             | Q6P2Q9                                                             | 58-664; 679-2026;<br>2068-2316<br>2038-2067   | 6AHD<br>AlphaFold2                     | docked and adjusted<br>docked and adjusted           |
|            | BRR2                   | B                             | O75643                                                             | 433-2125                                      | 6AHD                                   | docked and adjusted                                  |
|            | SNU114                 | C                             | Q15029                                                             | 105-956                                       | 6AHD                                   | docked and adjusted                                  |
|            | DIM1                   | D                             | P83876                                                             | 2-142                                         | 6AHD                                   | docked and adjusted                                  |
|            | U5-40K                 | E                             | Q96DI7                                                             | 58-356                                        | 6AHD                                   | docked                                               |
|            | SmB,D1,D2,<br>D3,E,F,G | 5b, 5l, 52,<br>53, 5e, 5f, 5g | P14678, P62314,<br>P62316,<br>P62318, P62304,<br>P62306,<br>P62308 | Sm fold                                       | 6AHD                                   | docked                                               |
|            | PRP6                   | N                             | O94906                                                             | 8-37; 136-140<br>141-208; 247-257;<br>265-941 | N.A.<br>6AHD                           | de novo modelling<br>docked and adjusted             |
| B-specific | SMU1                   | v,w                           | Q2TAY7                                                             | 3-188<br>204-513                              | 6Q8I<br>6AHD                           | docked<br>docked                                     |
|            | RED                    | x,y                           | Q13123                                                             | 207-211; 230-245;<br>250-257                  | 6Q8I                                   | docked                                               |
|            | SNU23                  | r                             | Q96NC0                                                             | 16-41<br>45-133                               | AlphaFold2<br>AlphaFold2               | docked<br>docked and adjusted                        |
|            | UBL5                   | s                             | Q9BZL1                                                             | 1-73                                          | AlphaFold2                             | docked and adjusted                                  |
|            | MFAP1                  | K                             | P55081                                                             | 141-174; 214-256;<br>271-314<br>315-405       | AlphaFold2<br>AlphaFold2<br>AlphaFold2 | docked<br>docked and adjusted<br>docked and adjusted |
|            | PRP38                  | I                             | Q8NAV1                                                             | 1-184                                         | AlphaFold2                             | docked and adjusted                                  |
|            | FBP21                  | X                             | O75554                                                             | 1-8<br>9-82                                   | N.A.<br>6AHD                           | de novo modelling<br>docked and adjusted             |
| Other      | TCERG1                 | T                             | O14776                                                             | 657-845; 856-1080                             | AlphaFold2                             | docked and adjusted                                  |
|            | SRSF1                  | z                             | Q07955                                                             | 122-195                                       | 7ABG                                   | docked                                               |
|            | BUD31                  | Q                             | P41223                                                             | 3-144                                         | 6FF4                                   | docked and adjusted                                  |
|            | Pre-mRNA               | Z                             | N.A.                                                               | 49-79 ('-10' - '+21')<br>144-158              | N.A.<br>6AHD                           | de novo modelling<br>docked                          |

**Appendix Table S5. Summary of newly-modeled or more accurately docked/modeled protein and RNA regions in our hB complex.** Improvements are based on comparisons with previously published hB complex cryo-EM structures (Bertram *et al*, 2017; Zhan *et al*, 2018). “Docking” refers to the placement of a known protein structure (as a rigid body) into the low-resolution EM density map. “Located for the first time” indicates that a known protein structure was not included in previous hB complex models but could be fit (i.e., docked) for the first time into our low-resolution EM density map. “Modeled for the first time” means that the atomic model was built into high-resolution EM density based on existing crystal structures or AlphaFold predictions.

|                | Protein/RNA                              | Modeled Region/domain                         |                                                     |
|----------------|------------------------------------------|-----------------------------------------------|-----------------------------------------------------|
| U2 snRNP       | U2 snRNA                                 | 3-14; 29-65                                   | Improved resolution allows more accurate docking    |
|                | SF3B1                                    | 457-1304                                      |                                                     |
|                |                                          | 394-415                                       |                                                     |
|                | SF3B2                                    | 458-602; 604-667                              |                                                     |
|                | SF3B3                                    | 1-645; 663-691; 695-830 ; 834-1068; 1078-1217 |                                                     |
|                | SF3B4                                    | 12-89                                         | Located for the first time in the human B complex   |
|                | SF3B5                                    | 12-80                                         |                                                     |
|                | PHF5A                                    | 2-101                                         | Improved resolution allows more accurate docking    |
|                | SF3B6                                    | 12-101                                        |                                                     |
|                | SmB,D1,D2,D3,E,F,G                       | Sm fold                                       | Modeled for the first time in the human B complex   |
|                | SF3A1                                    | 160-282                                       |                                                     |
|                |                                          | 422-447; 455-473 ; 409-421; 448-454; 474-489  | Improved resolution allows more accurate docking    |
|                | SF3A2                                    | 41-85 ; 104-126 ; 133-209                     |                                                     |
|                | SF3A3                                    | 1-229 ; 279-362 ; 393-462                     |                                                     |
|                | U2 snRNA                                 | 97-107; 147-184                               |                                                     |
|                | U2 A'                                    | 2-163                                         |                                                     |
| U4/U6 di-snRNP | U2 B''                                   | 3-84                                          | Improved resolution allows more accurate modeling   |
|                | U4 snRNA                                 | 1-62; 68-76                                   |                                                     |
|                |                                          | 77-96 ; 105-133; 138-145                      | Improved resolution allows more accurate modeling   |
|                | SmB,D1,D2,D3,E,F,G                       | Sm fold                                       |                                                     |
|                | U6 snRNA                                 | 1-43; 50-78                                   | Improved resolution allows more accurate modeling   |
|                |                                          | 44-49                                         |                                                     |
|                |                                          | 85-96                                         | Previously incorrectly-modeled region was corrected |
|                |                                          | 102-105                                       |                                                     |
|                | LSm2, LSm3, LSm4, LSm5, LSm6, LSm7, LSm8 | Sm fold                                       | Improved resolution allows more accurate docking    |
|                | PRP3                                     | 385-395; 412-427                              |                                                     |
|                |                                          | 413-606; 627-683                              | Improved resolution allows more accurate modeling   |
|                | PRP4                                     | 81-152; 164-522                               |                                                     |
|                | PRP31                                    | 52-80; 86-347; 351-432                        | Improved resolution allows more accurate docking    |
|                | PPIH                                     | 9-177                                         |                                                     |
| Tri-snRNP      | SNU13                                    | 5-128                                         | Improved resolution allows more accurate modeling   |
|                | SNU66                                    | 148-191; 198-219; 252-358; 359-375            |                                                     |
|                | U5 snRNA                                 | 3-117                                         | Improved resolution allows more accurate docking    |
| U5 snRNP       | PRP8                                     | 58-664; 679-2026; 2068-2316                   |                                                     |
|                |                                          | 2038-2067                                     | Modeled for the first time in the human B complex   |
|                | BRR2                                     | 433-1288                                      |                                                     |
|                |                                          | 1289-2125                                     | Improved resolution allows more accurate modeling   |
|                | SNU114                                   | 105-956                                       |                                                     |
|                | DIM1                                     | 2-142                                         | Improved resolution allows more accurate docking    |
|                | U5-40K                                   | 58-356                                        |                                                     |
|                | SmB,D1,D2,D3,E,F,G                       | Sm fold                                       | Modeled for the first time in the human B complex   |
|                | PRP6                                     | 8-37; 136-140                                 |                                                     |
|                |                                          | 141-208; 247-257                              | Improved resolution allows more accurate modeling   |
| B-specific     |                                          | 265-941                                       |                                                     |
|                | SMU1                                     | 3-188                                         | Located for the first time in the human B complex   |
|                |                                          | 204-513                                       |                                                     |
|                | RED                                      | 207-211; 230-245; 250-257                     | Modeled for the first time in the human B complex   |
|                | SNU23                                    | 16-41                                         |                                                     |
|                |                                          | 45-80                                         | Improved resolution allows more accurate modeling   |
|                |                                          | 81-133                                        |                                                     |
|                | UBL5                                     | 1-73                                          | Located for the first time in the human B complex   |
|                | MFAP1                                    | 141-174                                       |                                                     |
|                |                                          | 214-256; 271-314                              | Modeled for the first time in the human B complex   |
| Other          |                                          | 315-405                                       |                                                     |
|                | PRP38                                    | 1-184                                         | Improved resolution allows more accurate modeling   |
|                | FBP21                                    | 1-7                                           |                                                     |
|                |                                          | 8-82                                          | Modeled for the first time in the human B complex   |
|                | TCERG1                                   | 657-845; 856-1080                             |                                                     |
|                | SRSF1                                    | 122-195                                       | Previously incorrectly-modeled region was corrected |
|                | BUD31                                    | 3-144                                         |                                                     |
| Other          | Pre-mRNA                                 | 49-53 (-10 to -6 relative to 5'ss)            | Improved resolution allows more accurate modeling   |
|                |                                          | 54-79 (-5 to +21 relative to 5'ss)            |                                                     |
|                |                                          | 144-158                                       | Improved resolution allows more accurate docking    |

## References

Bertram K, Agafonov DE, Dybkov O, Haselbach D, Leelaram MN, Will CL, Urlaub H, Kastner B, Lührmann R, Stark H (2017) Cryo-EM structure of a pre-catalytic human spliceosome primed for activation. *Cell* 170: 701-713

Charenton C, Wilkinson ME, Nagai K (2019) Mechanism of 5' splice site transfer for human spliceosome activation. *Science* 364: 362-367

Zhan X, Yan C, Zhang X, Lei J, Shi Y (2018) Structures of the human pre-catalytic spliceosome and its precursor spliceosome. *Cell Res* 28: 1129-1140
