# Supplementary material for: Cryo-EM analyses of dimerized spliceosomes provide new insights into the functions of B complex proteins
Source: EMBO J. 2024 Feb 21;43(6):1065–88. doi: 10.1038/s44318-024-00052-1 (PMC10943123; doi:10.1038/s44318-024-00052-1)
Supplement: Supplementary file 2 — Dataset EV1 [file 44318_2024_52_MOESM2_ESM.xlsx]

## Sheet: Dataset EV1
							FDR 1%	FDR 5%
Type	Protein 1	UniProt1	Protein 2	UniProt2	Residue 1	Residue 2	CSMs	CSMs	Scoremax
Inter	AQR	O60306	CDC5L	Q99459	195	522	1	1	1.04706
			ISY1	Q9ULR0	954	238	1	2	2.4382
			PRP19	Q9UMS4	759	200		3	0.316464
			RBM22	Q9NW64	493	229		1	0.297733
			SF3B5	Q9BWJ5	1025	82		1	0.225594
			SR140	O15042	762	945	1	1	0.416906
	BUB3	O43684	ROA0	Q13151	222	1		1	0.197401
			SMU1	Q2TAY7	52	475	2	3	1.15717
	BUD13	Q9BRD0	CCAR1	Q8IX12	605	1054		1	0.218509
	BUD31	P41223	PRP8	Q6P2Q9	125	36		1	0.220107
			TCRG1	O14776	68	711	1	1	0.511023
	CCAR1	Q8IX12	BUD13	Q9BRD0	1054	605		1	0.218509
			RBMX	P38159	967	150		1	0.193578
			SRS11	Q05519	978	318	2	4	0.607795
			TCRG1	O14776	606	495		1	0.236808
			U2AF2	P26368	978	70		2	0.290633
			U520	O75643	808	155		1	0.217928
	CCD12	Q8WUD4	CDC5L	Q99459	144	500	6	6	5.55306
			CRNL1	Q9BZJ0	126	549		1	0.183802
			SYF1	Q9HCS7	34	532		1	0.185714
					42	532	1	2	0.909995
					87	593	4	4	4.21227
					94	593	2	3	2.9688
	CD11B	P21127	DDX42	Q86XP3	20	903		3	0.324726
			PHF5A	Q7RTV0	108	108		1	0.251549
			PQBP1	O60828	108	189	1	2	0.411219
			PRP31	Q8WWY3	108	478		1	0.299133
			PRP6	O94906	108	408		1	0.216947
			SF3B6	Q9Y3B4	108	41	1	1	0.441067
	CD2B2	O95400	SF3A3	Q12874	185	64		1	0.299764
	CDC5L	Q99459	AQR	O60306	522	195	1	1	1.04706
			CCD12	Q8WUD4	500	144	6	6	5.55306
			CRNL1	Q9BZJ0	200	229	5	9	1.07519
					255	388	1	2	0.424939
			CTBL1	Q8WYA6	294	527	1	1	0.580491
			ISY1	Q9ULR0	187	55	1	3	0.661961
			PPIL2	Q13356	466	507	3	3	1.70818
			PRP17	O60508	200	333	4	11	0.931311
			PRP19	Q9UMS4	522	244	2	3	1.65809
					570	122		2	0.362423
					631	122		1	0.214794
					685	179	3	5	0.679371
					733	64	1	1	0.417378
					782	244	9	10	1.46809
						266		1	0.382138
			PRP8	Q6P2Q9	7	892	4	5	1.70907
					28	727	6	8	0.842631
			SNR40	Q96DI7	771	18	1	1	0.886065
					795	270	9	17	1.12445
			SNUT1	O43290	170	133		2	0.346138
			SPF27	O75934	685	97	7	12	0.915587
					771	177	23	30	1.31124
					782	191	11	16	1.61415
			SYF1	Q9HCS7	290	654	12	14	1.39171
					294	654	31	32	7.23826
					522	532	5	8	3.57625
	CHERP	Q8IWX8	RBM39	Q14498	910	291		1	0.199857
			SR140	O15042	672	405	14	23	1.64433
	CPSF5	O43809	CPSF5	O43809	23	23	12	18	2.25705
	CRIPT	Q9P021	PRP17	O60508	80	374	4	4	1.5025
	CRNL1	Q9BZJ0	CCD12	Q8WUD4	549	126		1	0.183802
			CDC5L	Q99459	229	200	5	9	1.07519
					388	255	1	2	0.424939
			ISY1	Q9ULR0	213	127	1	1	0.410488
			PLRG1	O43660	602	80		1	0.238985
			PPIL2	Q13356	445	462	14	14	3.12768
					569	490		1	0.255398
					602	490	5	8	1.48787
			PRP17	O60508	213	531	1	1	0.576926
			SF3A3	Q12874	388	303		1	0.243396
			SNW1	Q13573	315	236	3	3	1.76979
			SYF2	O95926	381	140	7	13	1.47817
					388	140	6	8	1.68163
			U520	O75643	427	85		2	0.297972
			ZN830	Q96NB3	445	234	11	14	1.33963
					460	228		1	0.199035
						234	2	5	0.801491
	CTBL1	Q8WYA6	CDC5L	Q99459	527	294	1	1	0.580491
			PRP19	Q9UMS4	534	244		1	0.325065
			PRP8	Q6P2Q9	16	796		1	0.224746
					27	744	2	3	0.652884
						796	5	6	1.30403
					31	744	3	4	0.562995
						796	11	11	2.26575
			SF3B1	O75533	83	6	5	6	1.117
					84	6	1	1	0.404957
					91	6		3	0.351294
					95	21		1	0.33506
			SMD1	P62314	347	86		2	0.250658
			SNUT2	Q53GS9	437	341		1	0.193622
	CWC15	Q9P013	DDX17	Q92841	226	109		1	0.181698
			PLRG1	O43660	18	363	1	2	0.557655
			PRP8	Q6P2Q9	199	1158		2	0.285395
			RBM22	Q9NW64	18	76	12	16	2.01127
			SNUT1	O43290	152	530		1	0.20681
			SNW1	Q13573	18	153	17	17	3.28171
					152	311	1	1	0.390214
	CWC22	Q9HCG8	PRP17	O60508	243	538		2	0.328654
			PRP8	Q6P2Q9	330	366	4	7	1.64439
	CWC25	Q9NXE8	DHX16	O60231	378	826	7	7	1.64903
			NSRP1	Q9H0G5	149	199		1	0.260256
			PRP8	Q6P2Q9	29	1866	16	18	3.94192
			SRSF5	Q13243	249	125		1	0.214191
	CWC27	Q6UX04	FRG1	Q14331	372	8	1	1	0.477433
			IF4A3	P38919	429	60		1	0.274099
						374		1	0.203744
					434	374	6	6	1.48122
			SNR40	Q96DI7	193	18		1	0.249584
			U520	O75643	162	1146	1	1	0.68571
					372	85		1	0.307158
	DDX17	Q92841	CWC15	Q9P013	109	226		1	0.181698
	DDX23	Q9BUQ8	PPIE	Q9UNP9	175	108		1	0.208648
			PRP8	Q6P2Q9	259	278	1	1	0.447665
						1290	1	1	0.454662
					271	1306	4	4	1.33815
					382	162	2	10	0.719386
	DDX3X	O00571	MSTMBPMS2nc_Recombinant	P0AEX9-r	118	1		1	0.282611
			PRP6	O94906	589	148		1	0.307576
	DDX41	Q9UJV9	TCRG1	O14776	143	495		1	0.196212
	DDX42	Q86XP3	CD11B	P21127	903	20		3	0.324726
			DHX15	O43143	270	384	2	2	1.51172
					720	491	5	8	1.42198
			ENY2	Q9NPA8	605	8		1	0.184645
			MFAP1	P55081	30	67		1	0.29895
					50	67	1	1	1.34498
			MSTMBPMS2nc_Recombinant	P0AEX9-r	270	133	1	1	0.835074
					700	1		1	0.230467
			PNISR	Q8TF01	145	661		1	0.367522
			RBMX	P38159	895	150	1	1	0.53438
			SF3B3	Q15393	30	26		1	0.310934
					50	26	2	3	1.16306
						296	5	5	2.18668
			U5S1	Q15029	568	673		1	0.226222
	DDX46	Q7L014	PQBP1	O60828	146	130		1	0.20036
			PUF60	Q9UHX1	848	276	1	2	1.35321
					853	276	1	1	0.86811
			RBM22	Q9NW64	1000	104		1	0.295654
			SF3B1	O75533	248	573	2	6	0.981975
			SF3B2	Q13435	757	602		1	0.213628
			SNUT1	O43290	758	505	1	2	0.555382
	DHX15	O43143	DDX42	Q86XP3	384	270	2	2	1.51172
					491	720	5	8	1.42198
			SR140	O15042	491	145	6	8	2.75458
			TFP11	Q9UBB9	491	86		1	0.213323
	DHX16	O60231	CWC25	Q9NXE8	826	378	7	7	1.64903
			NSRP1	Q9H0G5	826	178	3	3	1.93408
			PPIL2	Q13356	73	95	2	2	1.89877
			PPIL4	Q8WUA2	213	300	4	5	0.891632
					220	300	4	4	2.10432
					291	212	8	8	3.28568
					302	201		1	0.381867
			PRP8	Q6P2Q9	860	833	15	30	1.727
						837	16	17	2.98484
						847	6	7	1.61774
			RU2A	P09661	220	30		1	0.278415
			SF3B1	O75533	69	6	1	1	0.462407
					1019	499	5	6	1.59929
						503		1	0.348204
			SNW1	Q13573	271	339	7	11	1.40981
					733	476		1	0.242896
					860	416	19	24	1.73881
	DHX8	Q14562	LC7L3	O95232	1080	78		1	0.223844
			PAXB1	Q9Y5B6	1024	140	1	1	0.494136
			RUXE	P62304	399	80		1	0.226347
			SF3B2	Q13435	114	605		1	0.201628
			SNUT1	O43290	484	400		1	0.265946
	DX39B	Q13838	MSTMBPMS2nc_Recombinant	P0AEX9-r	138	133		1	0.255197
	ENY2	Q9NPA8	DDX42	Q86XP3	8	605		1	0.184645
			PNISR	Q8TF01	43	422	1	1	0.942769
					47	359	6	6	2.78116
					85	431	7	7	2.26626
			PPIE	Q9UNP9	5	1	1	1	0.386645
			PRP6	O94906	2	395	11	13	1.79409
					5	395	6	15	0.787658
			RED	Q13123	85	281	2	2	1.35265
			ROA1	P09651	5	145		1	0.219435
			SMU1	Q2TAY7	36	107	2	2	0.714775
			SNUT1	O43290	2	188	6	6	1.4643
						214		1	0.191555
	FRG1	Q14331	CWC27	Q6UX04	8	372	1	1	0.477433
	FUS	P35637	RUXF	P62306	306	8	1	1	0.592363
	GPKOW	Q92917	PR40A	O75400	2	899		1	0.283155
			PRPF3	O43395	1	65		1	0.200019
			TCRG1	O14776	2	794		1	0.228975
	HSP7C	P11142	ISY1	Q9ULR0	451	101		1	0.343525
			PRP4	O43172	319	27		1	0.216593
			SF3A1	Q15459	526	486		1	0.300448
	IF4A3	P38919	CWC27	Q6UX04	60	429		1	0.274099
					374	429		1	0.203744
						434	6	6	1.48122
			MSTMBPMS2nc_Recombinant	P0AEX9-r	374	133		1	0.30891
			PININ	Q9H307	314	186	2	2	1.01912
	ISY1	Q9ULR0	AQR	O60306	238	954	1	2	2.4382
			CDC5L	Q99459	55	187	1	3	0.661961
			CRNL1	Q9BZJ0	127	213	1	1	0.410488
			HSP7C	P11142	101	451		1	0.343525
			PRP17	O60508	92	228	3	5	1.7288
			RU2A	P09661	260	193	1	1	0.484664
						205	2	3	0.628417
					266	56	1	2	0.755222
						191		1	0.182808
						193	2	4	1.37532
						221	3	3	2.08218
			SYF1	Q9HCS7	138	257	1	2	1.06764
	K1C9	P35527	U5S1	Q15029	396	341		1	0.184986
	KIN17	O60870	U5S1	Q15029	10	341		1	0.215826
	LC7L3	O95232	DHX8	Q14562	78	1080		1	0.223844
			MSTMBPMS2nc_Recombinant	P0AEX9-r	78	265		1	0.192949
			RS27A	P62979	2	107		1	0.215471
			SF3B2	Q13435	259	148		2	0.25498
	LSM2	Q9Y333	NCBP2	P52298	94	1		1	0.230432
			PRPF3	O43395	1	294	1	2	0.569038
						300	5	5	2.21773
					8	294	2	6	0.54369
						298		1	0.378148
						300	6	6	1.84866
					13	282	5	6	1.76615
					88	270	1	1	0.623745
						282		1	0.28669
						289	1	2	0.433353
						294	16	18	1.25316
						298	7	15	0.773488
						300	17	20	1.7835
	LSM4	Q9Y4Z0	LSM7	Q9UK45	8	8	1	1	1.54318
					80	4		2	0.353906
			LSM8	O95777	1	28	37	43	2.48752
					80	28	1	1	0.782695
			PRPF3	O43395	1	294	1	1	0.537379
			SRS11	Q05519	80	443	1	1	0.414062
	LSM5	Q9Y4Y9	RED	Q13123	20	54		1	0.376823
	LSM6	P62312	PRPF3	O43395	5	332	1	3	0.449385
						337	6	7	1.41746
			RED	Q13123	5	30	2	3	0.542187
			SF3A2	Q15428	5	10	1	3	0.85096
	LSM7	Q9UK45	LSM4	Q9Y4Z0	4	80		2	0.353906
					8	8	1	1	1.54318
			PAXB1	Q9Y5B6	9	197		1	0.182479
			PRPF3	O43395	4	334		1	0.373289
						345		1	0.306395
					6	334		2	0.361195
						345	3	4	1.21305
					8	345	7	7	1.68744
					9	345	1	3	0.86847
			WBP11	Q9Y2W2	21	565		2	0.35293
	LSM8	O95777	LSM4	Q9Y4Z0	28	1	37	43	2.48752
						80	1	1	0.782695
	MFAP1	P55081	DDX42	Q86XP3	67	30		1	0.29895
						50	1	1	1.34498
			PRP31	Q8WWY3	200	112		1	0.228672
			PRP6	O94906	26	667		1	0.257022
					67	667		2	0.213165
			PRP8	Q6P2Q9	238	2293	3	5	0.962346
					242	2293	7	8	2.92579
			SF3B1	O75533	9	807	1	1	0.970148
			SMU1	Q2TAY7	67	308	1	1	0.810031
					160	287		2	0.233209
						289	4	5	0.934453
			SNUT1	O43290	200	400	2	2	1.15371
					329	129	1	3	0.549795
			SRSF3	P84103	329	23	3	4	0.444306
			TCRG1	O14776	415	885		1	0.236398
					418	885	1	1	0.481225
			U520	O75643	249	1142	1	1	0.395198
					250	1142	13	18	2.09949
						1146	1	3	0.784008
					256	1142		1	0.281855
			U5S1	Q15029	434	359		1	0.205522
			ZMAT2	Q96NC0	256	132	7	9	2.45367
						136	1	1	0.576594
						138		1	0.196514
	MSTMBPMS2nc_Recombinant	P0AEX9-r	DDX3X	O00571	1	118		1	0.282611
			DDX42	Q86XP3	1	700		1	0.230467
					133	270	1	1	0.835074
			DX39B	Q13838	133	138		1	0.255197
			IF4A3	P38919	133	374		1	0.30891
			LC7L3	O95232	265	78		1	0.192949
			MSTMBPMS2nc_Recombinant	P0AEX9-r	60	60	4	6	0.937863
					520	520	6	20	0.875313
			PAXB1	Q9Y5B6	116	442		4	0.277677
			PPIG	Q13427	60	405		1	0.322746
			PRP19	Q9UMS4	1	192		1	0.254526
			PRP4B	Q13523	116	276		1	0.214625
			PRP8	Q6P2Q9	451	2293	6	10	0.638556
			ROA1	P09651	2	3		1	0.204894
						350	2	3	1.03754
					56	350		1	0.213594
					460	15	1	2	0.557721
					520	350		1	0.320394
			SF3B1	O75533	60	141		1	0.211357
					133	163	1	1	0.434117
			SF3B6	Q9Y3B4	116	2		1	0.248167
			SPF45	Q96I25	1	139		1	0.326809
			SRRM2	Q9UQ35	1	1766		1	0.338459
			SRRT	Q9BXP5	2	286	2	3	0.776137
					116	286	26	28	3.02512
					193	286	21	30	1.36702
					376	286	3	6	0.947755
						343		1	0.204652
					520	286	8	16	1.90499
			SUGP1	Q8IWZ8	116	13		1	0.214923
			SYF2	O95926	43	192		1	0.316384
			TOE1	Q96GM8	291	367		1	0.309054
	NADAP	Q9BWU0	SF3B6	Q9Y3B4	184	106	1	6	0.657145
			TBB2B	Q9BVA1	495	58	1	1	0.455802
	NCBP1	Q09161	NCBP2	P52298	17	7	3	5	0.54547
						34		2	0.328731
					20	7	3	5	0.85404
						38	2	3	3.88377
					67	7		2	0.347877
					327	7	2	2	1.06323
					511	78	10	10	3.97516
					607	67	2	6	0.83968
						68	23	23	3.35886
					654	67	1	5	2.0697
					657	38	11	15	3.42249
						67		2	0.350493
			NOSIP	Q9Y314	684	79	1	10	0.522859
			PR38B	Q5VTL8	188	227		1	0.367006
			PRP19	Q9UMS4	67	192		1	0.332344
			RSRC2	Q7L4I2	684	356		1	0.373539
			SR140	O15042	707	98		1	0.190638
			SRRT	Q9BXP5	204	285		2	0.198315
						286		1	0.192889
			SRSF1	Q07955	17	174	1	1	0.935685
					20	165	4	4	1.16643
						193	4	8	1.12558
			ZCH18	Q86VM9	41	343	3	3	0.459778
					221	319	5	5	0.964553
					241	328	1	2	0.88021
	NCBP2	P52298	LSM2	Q9Y333	1	94		1	0.230432
			NCBP1	Q09161	7	17	3	5	0.54547
						20	3	5	0.85404
						67		2	0.347877
						327	2	2	1.06323
					34	17		2	0.328731
					38	20	2	3	3.88377
						657	11	15	3.42249
					67	607	2	6	0.83968
						654	1	5	2.0697
						657		2	0.350493
					68	607	23	23	3.35886
					78	511	10	10	3.97516
			RNPS1	Q15287	78	149		1	0.278021
			RU17	P08621	78	168	1	1	1.14025
			SF3B1	O75533	77	943		2	0.328309
			SRRT	Q9BXP5	78	15		2	0.364682
						712	2	2	0.695005
			SRSF1	Q07955	7	165	10	10	3.51928
					78	38	7	7	2.43678
			SRSF6	Q13247	78	165	1	1	0.965285
			SRSF7	Q16629	78	112	4	4	2.26164
			U520	O75643	120	85		1	0.279994
	NH2L1	P55769	PRP4	O43172	21	408	2	2	1.25092
			PRP6	O94906	107	835	6	12	0.805836
					113	772		1	0.275419
						775	2	2	2.05369
			PRPF3	O43395	21	534		1	0.27468
			SF3A1	Q15459	86	424	1	1	0.516817
	NOSIP	Q9Y314	NCBP1	Q09161	79	684	1	10	0.522859
			TCRG1	O14776	6	495	1	1	0.655047
	NSRP1	Q9H0G5	CWC25	Q9NXE8	199	149		1	0.260256
			DHX16	O60231	178	826	3	3	1.93408
			PPIL4	Q8WUA2	522	138	1	2	0.712581
			RBMX	P38159	102	150		1	0.233745
			SF3B1	O75533	59	649	7	10	1.65786
			SNW1	Q13573	102	204		1	0.219307
			SRRM2	Q9UQ35	433	169		1	0.20778
			SRS11	Q05519	199	439		1	0.242706
	PAXB1	Q9Y5B6	DHX8	Q14562	140	1024	1	1	0.494136
			LSM7	Q9UK45	197	9		1	0.182479
			MSTMBPMS2nc_Recombinant	P0AEX9-r	442	116		4	0.277677
			UBL5	Q9BZL1	137	12	1	1	0.664692
			WBP11	Q9Y2W2	99	98		1	0.216408
	PHF5A	Q7RTV0	CD11B	P21127	108	108		1	0.251549
			PNISR	Q8TF01	108	666	1	1	0.458998
						667	1	1	0.453347
			RBMX	P38159	3	150	1	1	0.410386
			SF3B1	O75533	13	513	3	5	1.98976
					108	946	10	11	8.79698
			SF3B3	Q15393	13	137	3	3	1.64065
			SF3B6	Q9Y3B4	108	7	1	1	0.586976
						41		4	0.306053
			SPF30	O75940	73	219	3	3	1.47587
			U2AF2	P26368	108	329		1	0.225717
	PININ	Q9H307	IF4A3	P38919	186	314	2	2	1.01912
			SMD1	P62314	557	86		1	0.28863
			TCRG1	O14776	456	495		1	0.202986
	PLRG1	O43660	CRNL1	Q9BZJ0	80	602		1	0.238985
			CWC15	Q9P013	363	18	1	2	0.557655
			PRP19	Q9UMS4	1	122	3	3	1.59704
					7	122		2	0.239146
			PRPF3	O43395	47	40		1	0.198346
			SNW1	Q13573	135	23	1	2	0.774164
					180	110		1	0.196331
					320	158	7	10	1.06575
					363	158	9	10	1.55872
	PNISR	Q8TF01	DDX42	Q86XP3	661	145		1	0.367522
			ENY2	Q9NPA8	359	47	6	6	2.78116
					422	43	1	1	0.942769
					431	85	7	7	2.26626
			PHF5A	Q7RTV0	666	108	1	1	0.458998
					667	108	1	1	0.453347
			RED	Q13123	364	281		1	0.262409
					367	281	2	5	0.756991
			SF3B6	Q9Y3B4	666	41		1	0.206146
			SMU1	Q2TAY7	359	107		1	0.366199
			SRSF4	Q08170	641	154		1	0.306166
			U5S1	Q15029	242	951	4	5	1.22287
	PP1R8	Q12972	PR38A	Q8NAV1	334	1		1	0.243344
	PPIE	Q9UNP9	DDX23	Q9BUQ8	108	175		1	0.208648
			ENY2	Q9NPA8	1	5	1	1	0.386645
			SF3A1	Q15459	218	2	3	4	0.749078
			SF3A2	Q15428	5	216		1	0.371537
	PPIG	Q13427	MSTMBPMS2nc_Recombinant	P0AEX9-r	405	60		1	0.322746
			PRP4	O43172	70	38		1	0.220587
			SNUT1	O43290	332	133	1	2	0.408328
	PPIH	O43447	PRP4B	Q13523	101	358		1	0.360374
			PRP6	O94906	53	1	7	13	1.23769
						3	22	25	2.55805
					61	3		1	0.227831
			PRP8	Q6P2Q9	53	702	14	20	1.81485
						705	2	5	1.34797
			ROA1	P09651	143	350	6	6	1.28896
					153	350		2	0.213439
			SF3A1	Q15459	53	449	9	14	1.54468
					164	533	5	7	1.3428
					166	533	2	3	0.551328
			U520	O75643	101	349	2	2	0.573063
						368	5	9	1.20204
					153	426	1	2	0.547481
			WBP4	O75554	164	56	1	3	0.502963
						60	2	3	0.691826
						63	8	9	3.80542
					166	56	2	3	0.63762
						60	8	15	0.592745
						63	12	14	2.46223
	PPIL1	Q9Y3C6	SNW1	Q13573	158	97	3	4	0.69624
			SPF27	O75934	80	168	1	2	0.943288
					161	158	2	2	0.737796
	PPIL2	Q13356	CDC5L	Q99459	507	466	3	3	1.70818
			CRNL1	Q9BZJ0	462	445	14	14	3.12768
					490	569		1	0.255398
						602	5	8	1.48787
			DHX16	O60231	95	73	2	2	1.89877
			PRP8	Q6P2Q9	226	727	4	6	1.42506
					230	727	1	7	0.61512
					232	727	3	4	0.953134
					245	796	1	1	0.872822
			SMU1	Q2TAY7	1	512		1	0.20578
			SYF1	Q9HCS7	508	532		2	0.347111
					509	532	1	2	0.439459
			ZN830	Q96NB3	313	228	1	2	0.798494
						234	24	26	2.25228
					450	234	2	2	0.992181
					462	234		1	0.384377
	PPIL4	Q8WUA2	DHX16	O60231	201	302		1	0.381867
					212	291	8	8	3.28568
					300	213	4	5	0.891632
						220	4	4	2.10432
			NSRP1	Q9H0G5	138	522	1	2	0.712581
			ROA2	P22626	327	113		1	0.185553
			SMU1	Q2TAY7	490	308		1	0.18259
	PPWD1	Q96BP3	PR40A	O75400	614	376		1	0.24392
			PRP8	Q6P2Q9	114	2049	2	4	1.55256
					472	2049	2	2	0.969264
			RBM10	P98175	313	1		1	0.200513
			RU2A	P09661	614	56	3	3	0.902262
					646	56	1	1	0.955331
			SF3B6	Q9Y3B4	445	7		1	0.181718
			U520	O75643	293	103	1	3	0.598208
	PQBP1	O60828	CD11B	P21127	189	108	1	2	0.411219
			DDX46	Q7L014	130	146		1	0.20036
			PRP6	O94906	197	53		1	0.186373
						61	1	1	0.774749
			PRP8	Q6P2Q9	197	666	2	7	0.715644
						670	2	3	0.720455
			SNR40	Q96DI7	116	349		1	0.22085
			U520	O75643	2	46	1	1	0.642599
						85	11	11	3.87577
					18	60	3	4	0.729811
					116	14	1	1	0.803141
			ZMAT2	Q96NC0	228	36	1	1	0.525801
						39	4	5	1.2705
	PR38A	Q8NAV1	PP1R8	Q12972	1	334		1	0.243344
			U520	O75643	92	1116		1	0.267282
			ZMAT2	Q96NC0	7	45	15	25	2.20225
						102	5	9	0.831502
					50	132	14	16	1.6328
					92	123	1	2	0.550302
	PR38B	Q5VTL8	NCBP1	Q09161	227	188		1	0.367006
			PRP8	Q6P2Q9	92	2049	1	2	0.845944
			RU17	P08621	210	168	7	7	1.71006
			SAP18	O00422	210	18		1	0.195844
			SF3A1	Q15459	309	264		1	0.253799
			SF3A3	Q12874	372	69		1	0.241418
			SF3B3	Q15393	210	1191	1	1	0.41469
			SRRT	Q9BXP5	105	476	3	3	2.05124
					227	476	3	5	0.625153
						691	1	2	0.42005
			SRSF7	Q16629	210	70	7	8	1.30149
	PR40A	O75400	GPKOW	Q92917	899	2		1	0.283155
			PPWD1	Q96BP3	376	614		1	0.24392
			PRP8	Q6P2Q9	844	796		1	0.217411
			SNUT1	O43290	755	780		1	0.190478
	PRCC	Q92733	SYF1	Q9HCS7	193	458	3	3	0.836625
	PRP16	Q92620	PRP8	Q6P2Q9	875	2034	2	2	0.723506
						2049	6	7	2.76522
			U520	O75643	523	177	1	1	0.896788
	PRP17	O60508	CDC5L	Q99459	333	200	4	11	0.931311
			CRIPT	Q9P021	374	80	4	4	1.5025
			CRNL1	Q9BZJ0	531	213	1	1	0.576926
			CWC22	Q9HCG8	538	243		2	0.328654
			ISY1	Q9ULR0	228	92	3	5	1.7288
			PRP8	Q6P2Q9	161	36		1	0.317437
			RBM5	P52756	440	314		1	0.256569
			WDR70	Q9NW82	440	509	7	9	1.38197
	PRP19	Q9UMS4	AQR	O60306	200	759		3	0.316464
			CDC5L	Q99459	64	733	1	1	0.417378
					122	570		2	0.362423
						631		1	0.214794
					179	685	3	5	0.679371
					244	522	2	3	1.65809
						782	9	10	1.46809
					266	782		1	0.382138
			CTBL1	Q8WYA6	244	534		1	0.325065
			MSTMBPMS2nc_Recombinant	P0AEX9-r	192	1		1	0.254526
			NCBP1	Q09161	192	67		1	0.332344
			PLRG1	O43660	122	1	3	3	1.59704
						7		2	0.239146
			PRP19	Q9UMS4	64	64		6	0.328456
					135	135	8	8	1.46704
					244	244	2	4	0.653617
					266	266		2	0.208619
					425	428	1	1	0.58252
					428	425	1	1	0.58252
			RBM5	P52756	192	197		2	0.2125
			SNR40	Q96DI7	122	1	1	2	0.913768
						6		1	0.306459
						275	4	4	1.66519
					192	275	2	4	0.91445
					244	275	2	2	1.27329
			SPF27	O75934	179	168	1	1	0.878216
					244	168	6	6	2.11615
			SRRT	Q9BXP5	122	730		1	0.190297
			ZN830	Q96NB3	425	149		1	0.240227
	PRP31	Q8WWY3	CD11B	P21127	478	108		1	0.299133
			MFAP1	P55081	112	200		1	0.228672
			PRP6	O94906	53	793	5	6	1.17563
						883	8	12	1.60961
						938	2	7	0.864523
					112	856		1	0.212541
						938	1	2	0.420174
					117	883	12	15	1.67549
					438	836	1	2	0.429297
						856		1	0.337544
					470	408	7	7	2.57334
					471	242	3	3	2.14605
						408	20	22	2.72108
					478	408	2	3	1.51075
					488	408	3	6	1.1756
					490	408	3	8	1.00748
						585		1	0.365046
					493	408	2	2	0.532807
			PRP8	Q6P2Q9	112	1300		2	0.291137
					373	1749	1	1	0.388627
	PRP4	O43172	HSP7C	P11142	27	319		1	0.216593
			NH2L1	P55769	408	21	2	2	1.25092
			PPIG	Q13427	38	70		1	0.220587
			PRP6	O94906	216	737	7	8	2.3914
					486	772	5	11	0.801593
			PRPF3	O43395	159	361	1	3	1.09049
					175	407	1	2	0.507261
					200	376	3	3	0.859769
					216	361		1	0.315485
					284	407	10	12	2.23663
			SF3A1	Q15459	146	419	1	5	0.567647
					149	419	18	32	0.890655
						424	1	1	1.49771
					150	419	1	6	0.478158
					154	419		2	0.353797
					156	419		1	0.250565
					159	391	1	5	1.14063
						399	9	9	1.80832
						419	7	12	1.99698
					175	391	5	16	0.705112
			SF3B3	Q15393	38	531		1	0.203373
			SRSF9	Q13242	26	169		1	0.228275
			U520	O75643	15	1556	7	7	6.30391
						1557	3	3	4.95544
						1567	14	16	2.83443
						1595	9	9	2.61922
						1603	22	27	2.08868
						1610	5	5	3.23976
						1874	13	16	1.44323
					26	1556	11	11	2.69581
						1557	2	3	1.08558
						1595	1	4	0.483489
					27	1556	4	4	1.74935
						1595	1	1	0.518169
					45	944	6	10	1.06063
					53	671	5	11	0.739451
						944	9	15	1.38519
					57	451	1	3	0.556593
						453	1	1	1.92545
			WBP4	O75554	15	334		1	0.274952
						338	1	3	0.386273
	PRP4B	Q13523	MSTMBPMS2nc_Recombinant	P0AEX9-r	276	116		1	0.214625
			PPIH	O43447	358	101		1	0.360374
			SMD1	P62314	313	86	2	2	1.17796
					315	86		1	0.291755
			U520	O75643	211	103		1	0.321057
			ZCH18	Q86VM9	99	933	1	1	0.494341
						948	11	12	1.68065
						952	21	28	1.82464
					117	936	11	11	2.87116
	PRP6	O94906	CD11B	P21127	408	108		1	0.216947
			DDX3X	O00571	148	589		1	0.307576
			ENY2	Q9NPA8	395	2	11	13	1.79409
						5	6	15	0.787658
			MFAP1	P55081	667	26		1	0.257022
						67		2	0.213165
			NH2L1	P55769	772	113		1	0.275419
					775	113	2	2	2.05369
					835	107	6	12	0.805836
			PPIH	O43447	1	53	7	13	1.23769
					3	53	22	25	2.55805
						61		1	0.227831
			PQBP1	O60828	53	197		1	0.186373
					61	197	1	1	0.774749
			PRP31	Q8WWY3	242	471	3	3	2.14605
					408	470	7	7	2.57334
						471	20	22	2.72108
						478	2	3	1.51075
						488	3	6	1.1756
						490	3	8	1.00748
						493	2	2	0.532807
					585	490		1	0.365046
					793	53	5	6	1.17563
					836	438	1	2	0.429297
					856	112		1	0.212541
						438		1	0.337544
					883	53	8	12	1.60961
						117	12	15	1.67549
					938	53	2	7	0.864523
						112	1	2	0.420174
			PRP4	O43172	737	216	7	8	2.3914
					772	486	5	11	0.801593
			PRP8	Q6P2Q9	53	670		1	0.283859
					130	670		1	0.204224
						744	3	3	1.1494
					137	670	8	14	0.711668
						674		1	0.19602
						744	13	43	0.943823
					148	744	11	22	0.880127
					242	833	2	2	1.56783
						837	1	5	0.402891
						932	1	4	0.531059
					324	837	4	4	1.13978
					334	1994	4	6	3.4068
			PRPF3	O43395	540	65	6	8	1.76412
					573	65	3	3	1.34441
					667	46		1	0.19526
						205		2	0.231845
					772	625	3	6	0.987799
						626	10	13	4.01137
						629	12	25	0.894438
			RED	Q13123	408	386	5	8	2.74554
						388	4	6	3.01795
					667	386		2	0.279166
						388		1	0.211763
						398	2	2	0.58362
						408		2	0.298639
						413	5	12	0.750867
						432		1	0.278038
						474	1	1	0.617131
						475	3	5	0.597601
						509		3	0.281542
						520	5	7	0.746032
						525		2	0.271743
						534	4	5	1.32765
						544	3	5	0.537196
						553	1	3	0.425816
					772	427		1	0.287072
						432		2	0.3451
						501	2	3	0.527179
						509	1	2	0.842758
						520	6	6	0.834685
			SF3A1	Q15459	61	487	1	2	0.695505
					130	486		1	0.200723
					137	487		1	0.287351
					148	487	2	2	0.920937
			SF3B2	Q13435	408	877		1	0.208909
					540	877	2	6	1.06786
					573	877		1	0.295312
					574	891	1	1	0.577
					585	877	5	5	2.67418
						891	4	6	0.925879
					772	857	1	3	0.614271
						877	1	2	0.414287
					917	894	3	4	1.26945
			SMD2	P62316	772	18		1	0.1866
			SNUT1	O43290	334	175	7	12	1.66404
						183	3	5	1.12986
					395	188	15	18	1.94314
						214	34	36	2.71196
			TCRG1	O14776	242	1049	1	1	0.509824
			U520	O75643	395	103	1	1	0.607674
						426	1	1	0.640883
						695	6	6	0.986358
			ZCH18	Q86VM9	540	771		1	0.194176
	PRP8	Q6P2Q9	BUD31	P41223	36	125		1	0.220107
			CDC5L	Q99459	727	28	6	8	0.842631
					892	7	4	5	1.70907
			CTBL1	Q8WYA6	744	27	2	3	0.652884
						31	3	4	0.562995
					796	16		1	0.224746
						27	5	6	1.30403
						31	11	11	2.26575
			CWC15	Q9P013	1158	199		2	0.285395
			CWC22	Q9HCG8	366	330	4	7	1.64439
			CWC25	Q9NXE8	1866	29	16	18	3.94192
			DDX23	Q9BUQ8	162	382	2	10	0.719386
					278	259	1	1	0.447665
					1290	259	1	1	0.454662
					1306	271	4	4	1.33815
			DHX16	O60231	833	860	15	30	1.727
					837	860	16	17	2.98484
					847	860	6	7	1.61774
			MFAP1	P55081	2293	238	3	5	0.962346
						242	7	8	2.92579
			MSTMBPMS2nc_Recombinant	P0AEX9-r	2293	451	6	10	0.638556
			PPIH	O43447	702	53	14	20	1.81485
					705	53	2	5	1.34797
			PPIL2	Q13356	727	226	4	6	1.42506
						230	1	7	0.61512
						232	3	4	0.953134
					796	245	1	1	0.872822
			PPWD1	Q96BP3	2049	114	2	4	1.55256
						472	2	2	0.969264
			PQBP1	O60828	666	197	2	7	0.715644
					670	197	2	3	0.720455
			PR38B	Q5VTL8	2049	92	1	2	0.845944
			PR40A	O75400	796	844		1	0.217411
			PRP16	Q92620	2034	875	2	2	0.723506
					2049	875	6	7	2.76522
			PRP17	O60508	36	161		1	0.317437
			PRP31	Q8WWY3	1300	112		2	0.291137
					1749	373	1	1	0.388627
			PRP6	O94906	670	53		1	0.283859
						130		1	0.204224
						137	8	14	0.711668
					674	137		1	0.19602
					744	130	3	3	1.1494
						137	13	43	0.943823
						148	11	22	0.880127
					833	242	2	2	1.56783
					837	242	1	5	0.402891
						324	4	4	1.13978
					932	242	1	4	0.531059
					1994	334	4	6	3.4068
			RBM5	P52756	595	5	1	2	0.711052
			RED	Q13123	1020	520	5	5	0.948275
			RUXE	P62304	2112	67	1	3	0.388551
			SF3A1	Q15459	666	486	3	15	1.24062
					670	486	3	5	0.893127
					744	486	4	9	0.579822
						487	10	14	1.38815
						495	4	6	0.444103
						499	2	4	0.451188
						533	1	6	0.850569
					796	533	2	4	1.54392
			SF3B1	O75533	1505	943	7	12	0.849558
			SF3B3	Q15393	68	942		1	0.224358
			SMD2	P62316	1993	71	3	5	1.2733
			SMU1	Q2TAY7	1801	107	16	23	1.72758
			SNR40	Q96DI7	50	349	2	2	0.564875
			SNUT1	O43290	162	129		4	0.376996
					1344	142	1	1	3.53043
						147		1	0.18399
						662	4	5	2.03184
					1649	142	2	2	1.12651
						147	1	1	1.26262
					1735	657	6	6	1.81089
					1993	297	83	113	3.85133
						309	2	5	1.51825
					1994	297	3	6	0.8106
					2031	310	4	9	0.589257
					2034	310	1	2	0.566114
			SNUT2	Q53GS9	727	405	3	5	0.762247
					983	508	1	4	0.467552
			SNW1	Q13573	666	158	1	3	0.619106
						217		2	0.226539
					702	236		2	0.350909
					796	266	3	5	0.962904
					847	416	1	1	0.400178
			SYF2	O95926	796	192		1	0.215804
			TCRG1	O14776	1210	1024	5	15	0.767877
			TXN4A	P83876	674	40	2	2	0.649773
					721	109	32	38	2.58044
					773	109	2	5	0.525597
					774	51	1	1	1.23944
						109	11	13	1.92651
					1020	51	11	18	1.3809
						109	15	17	3.57686
			U520	O75643	43	85		1	0.188345
					1994	73	1	2	0.390054
					2034	729	1	1	0.606984
						733		1	0.264866
					2049	60		1	0.221443
						729	3	6	0.936492
						770	1	2	1.01571
						1039	2	4	0.888711
					2070	1039	1	1	0.698941
					2112	1006	1	3	0.773777
			U5S1	Q15029	218	405	5	8	1.32373
						409	1	6	0.417567
					366	359	26	37	1.94492
					1859	673		1	0.2983
			WBP4	O75554	2031	6	14	16	3.92121
					2034	6	17	25	2.37491
			ZCH18	Q86VM9	366	510	2	3	0.460887
	PRPF3	O43395	GPKOW	Q92917	65	1		1	0.200019
			LSM2	Q9Y333	270	88	1	1	0.623745
					282	13	5	6	1.76615
						88		1	0.28669
					289	88	1	2	0.433353
					294	1	1	2	0.569038
						8	2	6	0.54369
						88	16	18	1.25316
					298	8		1	0.378148
						88	7	15	0.773488
					300	1	5	5	2.21773
						8	6	6	1.84866
						88	17	20	1.7835
			LSM4	Q9Y4Z0	294	1	1	1	0.537379
			LSM6	P62312	332	5	1	3	0.449385
					337	5	6	7	1.41746
			LSM7	Q9UK45	334	4		1	0.373289
						6		2	0.361195
					345	4		1	0.306395
						6	3	4	1.21305
						8	7	7	1.68744
						9	1	3	0.86847
			NH2L1	P55769	534	21		1	0.27468
			PLRG1	O43660	40	47		1	0.198346
			PRP4	O43172	361	159	1	3	1.09049
						216		1	0.315485
					376	200	3	3	0.859769
					407	175	1	2	0.507261
						284	10	12	2.23663
			PRP6	O94906	46	667		1	0.19526
					65	540	6	8	1.76412
						573	3	3	1.34441
					205	667		2	0.231845
					625	772	3	6	0.987799
					626	772	10	13	4.01137
					629	772	12	25	0.894438
			RED	Q13123	65	205		1	0.217383
					649	54		1	0.189393
			RS27A	P62979	534	96	6	9	0.808186
						97		8	0.324143
			SF3B6	Q9Y3B4	294	29	6	7	1.38549
			SNUT1	O43290	446	133		1	0.209357
			SPF30	O75940	252	47	1	1	1.7033
					376	7	3	3	1.73542
						13	2	2	1.26258
					377	7		1	0.288573
					649	132	2	3	1.46138
						138		2	0.295574
						143	7	10	1.94912
			SRRM2	Q9UQ35	506	169		1	0.190215
			U2AF2	P26368	205	462	1	2	0.705519
			U520	O75643	458	440		5	0.207402
						451		1	0.252514
					495	695	5	7	0.696306
	PUF60	Q9UHX1	DDX46	Q7L014	276	848	1	2	1.35321
						853	1	1	0.86811
			SF3B1	O75533	489	195	2	3	1.39886
					541	163	1	1	0.709852
						214	2	2	1.59315
			SNW1	Q13573	276	97		3	0.329123
	R113A	O15541	U520	O75643	319	770	1	3	0.493464
	RBM10	P98175	PPWD1	Q96BP3	1	313		1	0.200513
	RBM22	Q9NW64	AQR	O60306	229	493		1	0.297733
			CWC15	Q9P013	76	18	12	16	2.01127
			DDX46	Q7L014	104	1000		1	0.295654
			SNW1	Q13573	40	153	1	1	1.17668
					286	81	3	4	2.66088
	RBM25	P49756	SF3B1	O75533	711	729	1	1	0.520009
			SMU1	Q2TAY7	471	379		1	0.189763
			SRS11	Q05519	241	241		2	0.222989
			TCRG1	O14776	449	634		1	0.187361
	RBM39	Q14498	CHERP	Q8IWX8	291	910		1	0.199857
			RED	Q13123	244	137	1	1	0.404864
			SF3B1	O75533	244	733	1	1	0.584532
					291	656	13	15	2.45148
						700	12	13	3.5997
					305	816	1	1	0.711262
					322	700	1	1	0.448097
			SRSF1	Q07955	111	174	1	1	0.469594
					119	179	1	7	0.571676
					178	174		1	0.353746
						179	6	15	0.657196
			SRSF2	Q01130	119	65		1	0.299598
			TFP11	Q9UBB9	103	610		1	0.215467
	RBM5	P52756	PRP17	O60508	314	440		1	0.256569
			PRP19	Q9UMS4	197	192		2	0.2125
			PRP8	Q6P2Q9	5	595	1	2	0.711052
	RBMX	P38159	CCAR1	Q8IX12	150	967		1	0.193578
			DDX42	Q86XP3	150	895	1	1	0.53438
			NSRP1	Q9H0G5	150	102		1	0.233745
			PHF5A	Q7RTV0	150	3	1	1	0.410386
	RED	Q13123	ENY2	Q9NPA8	281	85	2	2	1.35265
			LSM5	Q9Y4Y9	54	20		1	0.376823
			LSM6	P62312	30	5	2	3	0.542187
			PNISR	Q8TF01	281	364		1	0.262409
						367	2	5	0.756991
			PRP6	O94906	386	408	5	8	2.74554
						667		2	0.279166
					388	408	4	6	3.01795
						667		1	0.211763
					398	667	2	2	0.58362
					408	667		2	0.298639
					413	667	5	12	0.750867
					427	772		1	0.287072
					432	667		1	0.278038
						772		2	0.3451
					474	667	1	1	0.617131
					475	667	3	5	0.597601
					501	772	2	3	0.527179
					509	667		3	0.281542
						772	1	2	0.842758
					520	667	5	7	0.746032
						772	6	6	0.834685
					525	667		2	0.271743
					534	667	4	5	1.32765
					544	667	3	5	0.537196
					553	667	1	3	0.425816
			PRP8	Q6P2Q9	520	1020	5	5	0.948275
			PRPF3	O43395	54	649		1	0.189393
					205	65		1	0.217383
			RBM39	Q14498	137	244	1	1	0.404864
			SF3B1	O75533	112	943	1	3	0.41099
					137	816	6	7	1.00007
			SF3B2	Q13435	78	543		2	0.342421
					83	543	1	3	0.392507
						547	3	3	0.594042
						563	1	2	1.25926
			SMU1	Q2TAY7	198	107	9	9	1.72463
			SNW1	Q13573	281	379		1	0.344406
			SPF30	O75940	54	47	1	1	0.400222
					78	165	2	6	0.858537
					83	165	5	14	0.693519
			SRSF1	Q07955	205	193	1	1	0.880044
			TBB4A	P04350	137	324		1	0.274807
			ZMAT2	Q96NC0	224	123		1	0.189203
	RNPS1	Q15287	NCBP2	P52298	149	78		1	0.278021
	ROA0	Q13151	BUB3	O43684	1	222		1	0.197401
			ROA2	P22626	126	113	2	4	1.76753
	ROA1	P09651	ENY2	Q9NPA8	145	5		1	0.219435
			MSTMBPMS2nc_Recombinant	P0AEX9-r	3	2		1	0.204894
					15	460	1	2	0.557721
					350	2	2	3	1.03754
						56		1	0.213594
						520		1	0.320394
			PPIH	O43447	350	143	6	6	1.28896
						153		2	0.213439
			ROA2	P22626	106	120	1	1	0.505167
					113	113	1	1	0.404428
			SF3A2	Q15428	3	101	1	1	0.49543
						103	2	2	1.06535
						190	9	14	1.39708
					8	190	2	3	0.426327
			U520	O75643	78	479	3	4	1.66626
					105	85		1	0.201599
					350	451		1	0.349048
						479	6	7	0.894336
						557	2	3	1.61023
						944		2	0.239742
			ZMAT2	Q96NC0	350	8		1	0.198729
	ROA2	P22626	PPIL4	Q8WUA2	113	327		1	0.185553
			ROA0	Q13151	113	126	2	4	1.76753
			ROA1	P09651	113	113	1	1	0.404428
					120	106	1	1	0.505167
			SF3A3	Q12874	120	30	1	2	0.419765
			TCRG1	O14776	186	711		1	0.353068
	ROA3	P51991	SF3A1	Q15459	118	495		1	0.323881
	RS27A	P62979	LC7L3	O95232	107	2		1	0.215471
			PRPF3	O43395	96	534	6	9	0.808186
					97	534		8	0.324143
	RS4X	P62701	U2AF1	Q01081	10	15		1	0.195835
	RSMB	P14678	RU17	P08621	54	27	3	13	0.856462
			RU1C	P09234	88	52	29	34	3.21844
			RU2B	P08579	88	57	11	12	1.53901
			RUXG	P62308	36	3	22	38	1.47907
			SF3B2	Q13435	57	320	1	2	0.616453
			SMD1	P62314	5	41	1	2	0.696115
						86	3	3	0.568263
					8	41	46	68	2.48915
						86	4	4	1.44304
						88	2	5	0.404856
			SMD3	P62318	5	87	5	6	5.13597
					8	87	1	1	0.453091
					32	78		2	0.337664
						84	2	3	0.771633
					36	8	1	1	0.521822
					88	78	6	9	1.27577
						84	2	4	0.536991
						87		10	0.299481
			SNR40	Q96DI7	50	8	3	3	1.00349
						18		1	0.188459
					88	18		2	0.309529
			SNRPA	P09012	50	28	1	4	0.448518
			U520	O75643	88	469	3	3	1.1684
			U5S1	Q15029	88	98	1	1	0.85881
	RSRC2	Q7L4I2	NCBP1	Q09161	356	684		1	0.373539
			SRSF1	Q07955	209	165	3	5	0.747319
					248	165	3	3	1.1253
			SRSF7	Q16629	248	70	1	1	0.42548
			U2AF2	P26368	248	70		2	0.360847
	RU17	P08621	NCBP2	P52298	168	78	1	1	1.14025
			PR38B	Q5VTL8	168	210	7	7	1.71006
			RSMB	P14678	27	54	3	13	0.856462
			RUXE	P62304	27	67	47	58	3.62881
			SRSF1	Q07955	162	174	1	1	0.478004
	RU1C	P09234	RSMB	P14678	52	88	29	34	3.21844
			RUXG	P62308	22	10		2	0.239235
			SMD3	P62318	52	78	61	73	2.57401
	RU2A	P09661	DHX16	O60231	30	220		1	0.278415
			ISY1	Q9ULR0	56	266	1	2	0.755222
					191	266		1	0.182808
					193	260	1	1	0.484664
						266	2	4	1.37532
					205	260	2	3	0.628417
					221	266	3	3	2.08218
			PPWD1	Q96BP3	56	614	3	3	0.902262
						646	1	1	0.955331
			RU2B	P08579	30	101		1	0.356865
						111	5	7	2.9931
			SF3A1	Q15459	193	188	5	7	0.905736
					205	223	3	6	0.671342
					221	2		1	0.268423
						188	8	10	1.13671
						223	1	1	0.432882
			SF3A3	Q12874	30	97	54	61	3.21906
					172	64		1	0.2165
					179	64	4	5	2.42256
						69	6	7	1.49784
					193	64	2	2	0.812337
			SF3B1	O75533	191	175	1	3	0.468258
						177		5	0.258904
			SF3B2	Q13435	179	280		2	0.306855
					193	280	4	4	2.32308
					221	148		1	0.345807
			SNUT1	O43290	191	414		1	0.190398
			SYF1	Q9HCS7	205	2	2	2	0.63087
	RU2B	P08579	RSMB	P14678	57	88	11	12	1.53901
			RU2A	P09661	101	30		1	0.356865
					111	30	5	7	2.9931
			SF3A3	Q12874	57	97	2	3	2.0373
			SMD3	P62318	57	78	6	6	1.27026
					93	78	2	3	0.47909
						84	11	15	1.55552
	RUXE	P62304	DHX8	Q14562	80	399		1	0.226347
			PRP8	Q6P2Q9	67	2112	1	3	0.388551
			RU17	P08621	67	27	47	58	3.62881
			RUXG	P62308	12	3		1	0.241901
						10	4	15	0.548865
						11	7	7	0.958495
						15	14	24	1.04946
						16	9	11	1.03675
			TOE1	Q96GM8	67	74	6	6	3.30271
	RUXF	P62306	FUS	P35637	8	306	1	1	0.592363
			SMD2	P62316	8	6	5	12	0.873119
						8	17	25	2.28807
						18		1	0.244714
	RUXG	P62308	RSMB	P14678	3	36	22	38	1.47907
			RU1C	P09234	10	22		2	0.239235
			RUXE	P62304	3	12		1	0.241901
					10	12	4	15	0.548865
					11	12	7	7	0.958495
					15	12	14	24	1.04946
					16	12	9	11	1.03675
			SF3B2	Q13435	3	400		3	0.244563
					16	352	1	1	0.47829
			SMD3	P62318	3	8	1	1	0.421204
					11	31	25	27	1.91612
	SAP18	O00422	PR38B	Q5VTL8	18	210		1	0.195844
	SF3A1	Q15459	HSP7C	P11142	486	526		1	0.300448
			NH2L1	P55769	424	86	1	1	0.516817
			PPIE	Q9UNP9	2	218	3	4	0.749078
			PPIH	O43447	449	53	9	14	1.54468
					533	164	5	7	1.3428
						166	2	3	0.551328
			PR38B	Q5VTL8	264	309		1	0.253799
			PRP4	O43172	391	159	1	5	1.14063
						175	5	16	0.705112
					399	159	9	9	1.80832
					419	146	1	5	0.567647
						149	18	32	0.890655
						150	1	6	0.478158
						154		2	0.353797
						156		1	0.250565
						159	7	12	1.99698
					424	149	1	1	1.49771
			PRP6	O94906	486	130		1	0.200723
					487	61	1	2	0.695505
						137		1	0.287351
						148	2	2	0.920937
			PRP8	Q6P2Q9	486	666	3	15	1.24062
						670	3	5	0.893127
						744	4	9	0.579822
					487	744	10	14	1.38815
					495	744	4	6	0.444103
					499	744	2	4	0.451188
					533	744	1	6	0.850569
						796	2	4	1.54392
			ROA3	P51991	495	118		1	0.323881
			RU2A	P09661	2	221		1	0.268423
					188	193	5	7	0.905736
						221	8	10	1.13671
					223	205	3	6	0.671342
						221	1	1	0.432882
			SF3A1	Q15459	533	533		2	0.212494
			SF3A2	Q15428	2	190		1	0.224064
					259	101	1	3	0.654181
						103		1	0.29836
						107		1	0.256712
					264	101	1	4	0.393939
						190	2	2	0.694274
			SF3A3	Q12874	2	157	1	1	2.57434
						219		3	0.325063
					131	29		1	0.230043
						201		1	0.26792
						219	1	10	1.02945
						220	2	4	0.95315
					188	89	13	19	0.972541
						92	5	11	0.594531
					251	29	10	17	1.74335
					258	29	11	14	1.41365
					259	29	4	4	1.66376
			SF3B2	Q13435	217	275	3	5	0.747419
			SR140	O15042	30	749		1	0.186153
			SYF1	Q9HCS7	2	76		1	0.285025
						708	2	2	0.7547
					55	549	2	2	0.87631
			WBP11	Q9Y2W2	2	557	2	3	1.39414
						590		1	0.217375
						599	1	1	0.547955
						610		2	0.30877
						614	3	3	0.873476
						626	3	3	0.517803
					102	614		2	0.263507
					115	590	2	2	1.07925
						599		1	0.361433
						610	3	4	0.701573
						614	3	4	1.1862
						626	4	4	0.6464
					131	590	2	2	0.45377
						610		1	0.22365
						614	2	6	0.801703
					259	117		1	0.318144
	SF3A2	Q15428	LSM6	P62312	10	5	1	3	0.85096
			PPIE	Q9UNP9	216	5		1	0.371537
			ROA1	P09651	101	3	1	1	0.49543
					103	3	2	2	1.06535
					190	3	9	14	1.39708
						8	2	3	0.426327
			SF3A1	Q15459	101	259	1	3	0.654181
						264	1	4	0.393939
					103	259		1	0.29836
					107	259		1	0.256712
					190	2		1	0.224064
						264	2	2	0.694274
			SF3A3	Q12874	91	390	23	29	1.75845
			SF3B1	O75533	10	454	5	7	0.969054
						503		1	0.189995
			SF3B2	Q13435	42	550		2	0.330991
					216	268	13	13	1.23282
						275	5	7	0.818002
			SF3B4	Q15427	88	46	10	13	1.01551
					190	183	2	2	0.613627
			SF3B6	Q9Y3B4	10	104		1	0.247058
						105		1	0.256533
						106	5	6	1.39002
						111		2	0.288752
						114	2	6	0.712137
						116	7	13	1.13743
						125		3	0.346363
					42	116	1	1	0.391992
			SMD2	P62316	190	37		1	0.194138
			WBP11	Q9Y2W2	118	556	6	15	0.652472
						557	8	13	0.856484
						565		9	0.370555
	SF3A3	Q12874	CD2B2	O95400	64	185		1	0.299764
			CRNL1	Q9BZJ0	303	388		1	0.243396
			PR38B	Q5VTL8	69	372		1	0.241418
			ROA2	P22626	30	120	1	2	0.419765
			RU2A	P09661	64	172		1	0.2165
						179	4	5	2.42256
						193	2	2	0.812337
					69	179	6	7	1.49784
					97	30	54	61	3.21906
			RU2B	P08579	97	57	2	3	2.0373
			SF3A1	Q15459	29	131		1	0.230043
						251	10	17	1.74335
						258	11	14	1.41365
						259	4	4	1.66376
					89	188	13	19	0.972541
					92	188	5	11	0.594531
					157	2	1	1	2.57434
					201	131		1	0.26792
					219	2		3	0.325063
						131	1	10	1.02945
					220	131	2	4	0.95315
			SF3A2	Q15428	390	91	23	29	1.75845
			SF3B2	Q13435	64	280		4	0.352689
					69	280	27	42	1.16604
					466	605	5	7	1.72719
			SF3B3	Q15393	463	1074	12	20	0.958247
					466	984		1	0.220333
						1074	3	7	0.799448
					496	974	3	5	0.941173
			SF3B4	Q15427	29	183		1	0.247374
			SMD2	P62316	148	92		1	0.208037
					153	71		2	0.373957
					157	118	1	2	0.595811
	SF3B1	O75533	CTBL1	Q8WYA6	6	83	5	6	1.117
						84	1	1	0.404957
						91		3	0.351294
					21	95		1	0.33506
			DDX46	Q7L014	573	248	2	6	0.981975
			DHX16	O60231	6	69	1	1	0.462407
					499	1019	5	6	1.59929
					503	1019		1	0.348204
			MFAP1	P55081	807	9	1	1	0.970148
			MSTMBPMS2nc_Recombinant	P0AEX9-r	141	60		1	0.211357
					163	133	1	1	0.434117
			NCBP2	P52298	943	77		2	0.328309
			NSRP1	Q9H0G5	649	59	7	10	1.65786
			PHF5A	Q7RTV0	513	13	3	5	1.98976
					946	108	10	11	8.79698
			PRP8	Q6P2Q9	943	1505	7	12	0.849558
			PUF60	Q9UHX1	163	541	1	1	0.709852
					195	489	2	3	1.39886
					214	541	2	2	1.59315
			RBM25	P49756	729	711	1	1	0.520009
			RBM39	Q14498	656	291	13	15	2.45148
					700	291	12	13	3.5997
						322	1	1	0.448097
					733	244	1	1	0.584532
					816	305	1	1	0.711262
			RED	Q13123	816	137	6	7	1.00007
					943	112	1	3	0.41099
			RU2A	P09661	175	191	1	3	0.468258
					177	191		5	0.258904
			SF3A2	Q15428	454	10	5	7	0.969054
					503	10		1	0.189995
			SF3B2	Q13435	573	420		1	0.264377
					1292	486	5	7	0.794028
			SF3B3	Q15393	513	137	17	23	1.89678
					554	137	9	10	1.74234
			SF3B5	Q9BWJ5	513	17	1	4	1.72244
					554	17	2	4	0.647285
					1292	82	2	3	0.837708
			SF3B6	Q9Y3B4	413	29		1	0.314456
					430	7	3	6	0.880882
						41	3	4	1.70159
						116	2	3	0.690391
					454	114		1	0.212216
						116	1	4	0.620248
					866	7	9	11	1.42884
					943	41	19	26	1.37701
					946	41	6	11	1.10388
			SNUT1	O43290	649	175	1	1	0.586284
			SNW1	Q13573	926	108		1	0.213036
					943	441	6	12	1.23847
						456	1	4	0.428787
			TBB4A	P04350	729	379		1	0.319421
			TCRG1	O14776	1	794		8	0.332202
			TRIR	Q9BQ61	649	146	5	6	1.67699
					1292	106		2	0.353878
			U2AF2	P26368	214	453	2	3	1.02516
					656	462	5	5	1.99617
			YJU2	Q9BW85	214	55	1	1	0.967613
	SF3B2	Q13435	DDX46	Q7L014	602	757		1	0.213628
			DHX8	Q14562	605	114		1	0.201628
			LC7L3	O95232	148	259		2	0.25498
			PRP6	O94906	857	772	1	3	0.614271
					877	408		1	0.208909
						540	2	6	1.06786
						573		1	0.295312
						585	5	5	2.67418
						772	1	2	0.414287
					891	574	1	1	0.577
						585	4	6	0.925879
					894	917	3	4	1.26945
			RED	Q13123	543	78		2	0.342421
						83	1	3	0.392507
					547	83	3	3	0.594042
					563	83	1	2	1.25926
			RSMB	P14678	320	57	1	2	0.616453
			RU2A	P09661	148	221		1	0.345807
					280	179		2	0.306855
						193	4	4	2.32308
			RUXG	P62308	352	16	1	1	0.47829
					400	3		3	0.244563
			SF3A1	Q15459	275	217	3	5	0.747419
			SF3A2	Q15428	268	216	13	13	1.23282
					275	216	5	7	0.818002
					550	42		2	0.330991
			SF3A3	Q12874	280	64		4	0.352689
						69	27	42	1.16604
					605	466	5	7	1.72719
			SF3B1	O75533	420	573		1	0.264377
					486	1292	5	7	0.794028
			SF3B3	Q15393	604	1074	4	10	0.766389
					605	1074	32	35	2.38561
			SMD2	P62316	387	8	1	1	2.28993
			SMD3	P62318	352	31	4	12	0.727042
			SNUT2	Q53GS9	400	405		1	0.1935
			SPF30	O75940	543	160	3	4	1.91043
					550	160	1	1	0.893249
					560	160	1	1	0.508182
			TRIR	Q9BQ61	486	106	6	6	1.96203
	SF3B3	Q15393	DDX42	Q86XP3	26	30		1	0.310934
						50	2	3	1.16306
					296	50	5	5	2.18668
			PHF5A	Q7RTV0	137	13	3	3	1.64065
			PR38B	Q5VTL8	1191	210	1	1	0.41469
			PRP4	O43172	531	38		1	0.203373
			PRP8	Q6P2Q9	942	68		1	0.224358
			SF3A3	Q12874	974	496	3	5	0.941173
					984	466		1	0.220333
					1074	463	12	20	0.958247
						466	3	7	0.799448
			SF3B1	O75533	137	513	17	23	1.89678
						554	9	10	1.74234
			SF3B2	Q13435	1074	604	4	10	0.766389
						605	32	35	2.38561
			SF3B5	Q9BWJ5	137	17	12	26	1.35017
			SMU1	Q2TAY7	541	194	2	7	1.02136
						214		1	0.316479
					542	210	5	6	1.32367
						247	4	7	0.920356
						250	1	1	0.973752
					546	210		1	0.206311
						247	6	17	1.24053
						250	3	9	0.705718
					700	250		1	0.31491
			TRIR	Q9BQ61	137	161		1	0.275391
					911	106	2	3	1.59748
	SF3B4	Q15427	SF3A2	Q15428	46	88	10	13	1.01551
					183	190	2	2	0.613627
			SF3A3	Q12874	183	29		1	0.247374
	SF3B5	Q9BWJ5	AQR	O60306	82	1025		1	0.225594
			SF3B1	O75533	17	513	1	4	1.72244
						554	2	4	0.647285
					82	1292	2	3	0.837708
			SF3B3	Q15393	17	137	12	26	1.35017
	SF3B6	Q9Y3B4	CD11B	P21127	41	108	1	1	0.441067
			MSTMBPMS2nc_Recombinant	P0AEX9-r	2	116		1	0.248167
			NADAP	Q9BWU0	106	184	1	6	0.657145
			PHF5A	Q7RTV0	7	108	1	1	0.586976
					41	108		4	0.306053
			PNISR	Q8TF01	41	666		1	0.206146
			PPWD1	Q96BP3	7	445		1	0.181718
			PRPF3	O43395	29	294	6	7	1.38549
			SF3A2	Q15428	104	10		1	0.247058
					105	10		1	0.256533
					106	10	5	6	1.39002
					111	10		2	0.288752
					114	10	2	6	0.712137
					116	10	7	13	1.13743
						42	1	1	0.391992
					125	10		3	0.346363
			SF3B1	O75533	7	430	3	6	0.880882
						866	9	11	1.42884
					29	413		1	0.314456
					41	430	3	4	1.70159
						943	19	26	1.37701
						946	6	11	1.10388
					114	454		1	0.212216
					116	430	2	3	0.690391
						454	1	4	0.620248
			U2AF2	P26368	41	329	1	2	0.47647
	SLU7	O95391	SNUT1	O43290	365	219		1	0.1847
	SMD1	P62314	CTBL1	Q8WYA6	86	347		2	0.250658
			PININ	Q9H307	86	557		1	0.28863
			PRP4B	Q13523	86	313	2	2	1.17796
						315		1	0.291755
			RSMB	P14678	41	5	1	2	0.696115
						8	46	68	2.48915
					86	5	3	3	0.568263
						8	4	4	1.44304
					88	8	2	5	0.404856
			SMD2	P62316	86	6		3	0.253341
						8	2	2	1.11137
						18	7	17	1.33546
						37	3	3	1.02363
					88	8		1	0.230322
			SNR40	Q96DI7	44	18	1	1	0.633164
					86	226	5	7	1.15343
			SRSF6	Q13247	86	250		1	0.222253
			TCRG1	O14776	86	722		1	0.316992
			U520	O75643	41	1874	4	10	0.753805
					44	1874	1	2	0.437435
					86	1883	7	11	2.66436
					88	1883		4	0.347775
	SMD2	P62316	PRP6	O94906	18	772		1	0.1866
			PRP8	Q6P2Q9	71	1993	3	5	1.2733
			RUXF	P62306	6	8	5	12	0.873119
					8	8	17	25	2.28807
					18	8		1	0.244714
			SF3A2	Q15428	37	190		1	0.194138
			SF3A3	Q12874	71	153		2	0.373957
					92	148		1	0.208037
					118	157	1	2	0.595811
			SF3B2	Q13435	8	387	1	1	2.28993
			SMD1	P62314	6	86		3	0.253341
					8	86	2	2	1.11137
						88		1	0.230322
					18	86	7	17	1.33546
					37	86	3	3	1.02363
			SNUT1	O43290	71	648	8	8	4.20934
						657		1	0.189375
					118	531	3	3	5.37878
						662	2	2	1.64517
			SRRT	Q9BXP5	18	442		1	0.261486
					118	208	1	1	0.621724
						442		1	0.227787
			U5S1	Q15029	6	352	2	3	0.654627
	SMD3	P62318	RSMB	P14678	8	36	1	1	0.521822
					78	32		2	0.337664
						88	6	9	1.27577
					84	32	2	3	0.771633
						88	2	4	0.536991
					87	5	5	6	5.13597
						8	1	1	0.453091
						88		10	0.299481
			RU1C	P09234	78	52	61	73	2.57401
			RU2B	P08579	78	57	6	6	1.27026
						93	2	3	0.47909
					84	93	11	15	1.55552
			RUXG	P62308	8	3	1	1	0.421204
					31	11	25	27	1.91612
			SF3B2	Q13435	31	352	4	12	0.727042
	SMU1	Q2TAY7	BUB3	O43684	475	52	2	3	1.15717
			ENY2	Q9NPA8	107	36	2	2	0.714775
			MFAP1	P55081	287	160		2	0.233209
					289	160	4	5	0.934453
					308	67	1	1	0.810031
			PNISR	Q8TF01	107	359		1	0.366199
			PPIL2	Q13356	512	1		1	0.20578
			PPIL4	Q8WUA2	308	490		1	0.18259
			PRP8	Q6P2Q9	107	1801	16	23	1.72758
			RBM25	P49756	379	471		1	0.189763
			RED	Q13123	107	198	9	9	1.72463
			SF3B3	Q15393	194	541	2	7	1.02136
					210	542	5	6	1.32367
						546		1	0.206311
					214	541		1	0.316479
					247	542	4	7	0.920356
						546	6	17	1.24053
					250	542	1	1	0.973752
						546	3	9	0.705718
						700		1	0.31491
			SMU1	Q2TAY7	379	379		2	0.246123
			SNUT1	O43290	308	412	1	1	0.737268
						414	7	7	1.31264
					343	411	1	1	0.461674
						414		1	0.290301
					379	412	10	11	1.27276
						414	12	17	2.58434
			U520	O75643	214	975	1	1	0.579493
					308	971	30	44	2.14917
						974	1	1	0.419903
						975	28	30	4.59463
						1544	4	5	0.64751
						1552	56	91	2.97404
						1711	1	1	1.64378
						1715	15	20	1.8146
					485	349	1	1	0.434617
	SNR40	Q96DI7	CDC5L	Q99459	18	771	1	1	0.886065
					270	795	9	17	1.12445
			CWC27	Q6UX04	18	193		1	0.249584
			PQBP1	O60828	349	116		1	0.22085
			PRP19	Q9UMS4	1	122	1	2	0.913768
					6	122		1	0.306459
					275	122	4	4	1.66519
						192	2	4	0.91445
						244	2	2	1.27329
			PRP8	Q6P2Q9	349	50	2	2	0.564875
			RSMB	P14678	8	50	3	3	1.00349
					18	50		1	0.188459
						88		2	0.309529
			SMD1	P62314	18	44	1	1	0.633164
					226	86	5	7	1.15343
			SPF27	O75934	275	168	14	15	3.2944
						177	1	2	0.738762
						191	2	2	1.65219
			TCRG1	O14776	275	444	1	1	0.917839
			WBP11	Q9Y2W2	275	169	2	2	1.6279
					349	98	1	3	0.640601
			YBOX1	P67809	18	58		1	0.258468
	SNRPA	P09012	RSMB	P14678	28	50	1	4	0.448518
	SNUT1	O43290	CDC5L	Q99459	133	170		2	0.346138
			CWC15	Q9P013	530	152		1	0.20681
			DDX46	Q7L014	505	758	1	2	0.555382
			DHX8	Q14562	400	484		1	0.265946
			ENY2	Q9NPA8	188	2	6	6	1.4643
					214	2		1	0.191555
			MFAP1	P55081	129	329	1	3	0.549795
					400	200	2	2	1.15371
			PPIG	Q13427	133	332	1	2	0.408328
			PR40A	O75400	780	755		1	0.190478
			PRP6	O94906	175	334	7	12	1.66404
					183	334	3	5	1.12986
					188	395	15	18	1.94314
					214	395	34	36	2.71196
			PRP8	Q6P2Q9	129	162		4	0.376996
					142	1344	1	1	3.53043
						1649	2	2	1.12651
					147	1344		1	0.18399
						1649	1	1	1.26262
					297	1993	83	113	3.85133
						1994	3	6	0.8106
					309	1993	2	5	1.51825
					310	2031	4	9	0.589257
						2034	1	2	0.566114
					657	1735	6	6	1.81089
					662	1344	4	5	2.03184
			PRPF3	O43395	133	446		1	0.209357
			RU2A	P09661	414	191		1	0.190398
			SF3B1	O75533	175	649	1	1	0.586284
			SLU7	O95391	219	365		1	0.1847
			SMD2	P62316	531	118	3	3	5.37878
					648	71	8	8	4.20934
					657	71		1	0.189375
					662	118	2	2	1.64517
			SMU1	Q2TAY7	411	343	1	1	0.461674
					412	308	1	1	0.737268
						379	10	11	1.27276
					414	308	7	7	1.31264
						343		1	0.290301
						379	12	17	2.58434
			SRSF1	Q07955	129	179	2	4	0.646316
			TCRG1	O14776	11	1016	1	2	0.53413
					129	1035	7	8	3.5487
					133	1035	1	1	0.450451
					170	1035	3	6	1.52385
					175	1035	82	118	3.069
			U520	O75643	308	1049		1	0.225518
					309	1049	4	5	1.93536
					310	1006	1	1	0.479647
						1049	1	1	1.41768
					454	1556	10	14	1.29368
						1557	1	3	0.585066
					524	2072	4	5	1.40995
					530	2072	3	3	1.0356
					531	2072	9	10	1.33863
					657	2072	3	8	1.5925
					662	2072	6	9	1.28119
					749	349		1	0.291517
			UBL5	Q9BZL1	129	29	1	5	0.905386
					133	29		1	0.19664
					147	1	26	28	2.87473
	SNUT2	Q53GS9	CTBL1	Q8WYA6	341	437		1	0.193622
			PRP8	Q6P2Q9	405	727	3	5	0.762247
					508	983	1	4	0.467552
			SF3B2	Q13435	405	400		1	0.1935
			SRRM2	Q9UQ35	439	787		1	0.277552
	SNW1	Q13573	CRNL1	Q9BZJ0	236	315	3	3	1.76979
			CWC15	Q9P013	153	18	17	17	3.28171
					311	152	1	1	0.390214
			DHX16	O60231	339	271	7	11	1.40981
					416	860	19	24	1.73881
					476	733		1	0.242896
			NSRP1	Q9H0G5	204	102		1	0.219307
			PLRG1	O43660	23	135	1	2	0.774164
					110	180		1	0.196331
					158	320	7	10	1.06575
						363	9	10	1.55872
			PPIL1	Q9Y3C6	97	158	3	4	0.69624
			PRP8	Q6P2Q9	158	666	1	3	0.619106
					217	666		2	0.226539
					236	702		2	0.350909
					266	796	3	5	0.962904
					416	847	1	1	0.400178
			PUF60	Q9UHX1	97	276		3	0.329123
			RBM22	Q9NW64	81	286	3	4	2.66088
					153	40	1	1	1.17668
			RED	Q13123	379	281		1	0.344406
			SF3B1	O75533	108	926		1	0.213036
					441	943	6	12	1.23847
					456	943	1	4	0.428787
			SYF1	Q9HCS7	23	420		1	0.360486
	SPF27	O75934	CDC5L	Q99459	97	685	7	12	0.915587
					177	771	23	30	1.31124
					191	782	11	16	1.61415
			PPIL1	Q9Y3C6	158	161	2	2	0.737796
					168	80	1	2	0.943288
			PRP19	Q9UMS4	168	179	1	1	0.878216
						244	6	6	2.11615
			SNR40	Q96DI7	168	275	14	15	3.2944
					177	275	1	2	0.738762
					191	275	2	2	1.65219
	SPF30	O75940	PHF5A	Q7RTV0	219	73	3	3	1.47587
			PRPF3	O43395	7	376	3	3	1.73542
						377		1	0.288573
					13	376	2	2	1.26258
					47	252	1	1	1.7033
					132	649	2	3	1.46138
					138	649		2	0.295574
					143	649	7	10	1.94912
			RED	Q13123	47	54	1	1	0.400222
					165	78	2	6	0.858537
						83	5	14	0.693519
			SF3B2	Q13435	160	543	3	4	1.91043
						550	1	1	0.893249
						560	1	1	0.508182
			U520	O75643	138	85		1	0.199751
					142	85	1	1	0.421054
	SPF45	Q96I25	MSTMBPMS2nc_Recombinant	P0AEX9-r	139	1		1	0.326809
			U520	O75643	129	1977		2	0.264401
	SR140	O15042	AQR	O60306	945	762	1	1	0.416906
			CHERP	Q8IWX8	405	672	14	23	1.64433
			DHX15	O43143	145	491	6	8	2.75458
			NCBP1	Q09161	98	707		1	0.190638
			SF3A1	Q15459	749	30		1	0.186153
			U520	O75643	591	1145	2	2	0.519082
			ZCH18	Q86VM9	993	480	2	2	0.748236
	SRRM2	Q9UQ35	MSTMBPMS2nc_Recombinant	P0AEX9-r	1766	1		1	0.338459
			NSRP1	Q9H0G5	169	433		1	0.20778
			PRPF3	O43395	169	506		1	0.190215
			SNUT2	Q53GS9	787	439		1	0.277552
	SRRT	Q9BXP5	MSTMBPMS2nc_Recombinant	P0AEX9-r	286	2	2	3	0.776137
						116	26	28	3.02512
						193	21	30	1.36702
						376	3	6	0.947755
						520	8	16	1.90499
					343	376		1	0.204652
			NCBP1	Q09161	285	204		2	0.198315
					286	204		1	0.192889
			NCBP2	P52298	15	78		2	0.364682
					712	78	2	2	0.695005
			PR38B	Q5VTL8	476	105	3	3	2.05124
						227	3	5	0.625153
					691	227	1	2	0.42005
			PRP19	Q9UMS4	730	122		1	0.190297
			SMD2	P62316	208	118	1	1	0.621724
					442	18		1	0.261486
						118		1	0.227787
			TCRG1	O14776	476	816	1	1	0.465726
						820		1	0.201128
			U520	O75643	712	1025		1	0.189858
			ZCH18	Q86VM9	442	229	8	14	1.95597
					687	229	16	19	3.16705
					721	211		1	0.301813
						217	4	7	1.08528
					730	188	4	9	1.65328
					744	188		6	0.385173
						229		2	0.29403
	SRS11	Q05519	CCAR1	Q8IX12	318	978	2	4	0.607795
			LSM4	Q9Y4Z0	443	80	1	1	0.414062
			NSRP1	Q9H0G5	439	199		1	0.242706
			RBM25	P49756	241	241		2	0.222989
	SRSF1	Q07955	NCBP1	Q09161	165	20	4	4	1.16643
					174	17	1	1	0.935685
					193	20	4	8	1.12558
			NCBP2	P52298	38	78	7	7	2.43678
					165	7	10	10	3.51928
			RBM39	Q14498	174	111	1	1	0.469594
						178		1	0.353746
					179	119	1	7	0.571676
						178	6	15	0.657196
			RED	Q13123	193	205	1	1	0.880044
			RSRC2	Q7L4I2	165	209	3	5	0.747319
						248	3	3	1.1253
			RU17	P08621	174	162	1	1	0.478004
			SNUT1	O43290	179	129	2	4	0.646316
			SRSF2	Q01130	30	52		2	0.322689
					179	65	1	1	0.467836
			SRSF9	Q13242	165	169		1	0.187351
			TCRG1	O14776	179	1016	1	1	0.430317
			U2AF2	P26368	179	70	3	6	1.28466
	SRSF2	Q01130	RBM39	Q14498	65	119		1	0.299598
			SRSF1	Q07955	52	30		2	0.322689
					65	179	1	1	0.467836
			SRSF7	Q16629	17	24		1	0.198697
	SRSF3	P84103	MFAP1	P55081	23	329	3	4	0.444306
	SRSF4	Q08170	PNISR	Q8TF01	154	641		1	0.306166
			U520	O75643	313	85		1	0.191539
	SRSF5	Q13243	CWC25	Q9NXE8	125	249		1	0.214191
	SRSF6	Q13247	NCBP2	P52298	165	78	1	1	0.965285
			SMD1	P62314	250	86		1	0.222253
	SRSF7	Q16629	NCBP2	P52298	112	78	4	4	2.26164
			PR38B	Q5VTL8	70	210	7	8	1.30149
			RSRC2	Q7L4I2	70	248	1	1	0.42548
			SRSF2	Q01130	24	17		1	0.198697
			TCRG1	O14776	70	1016		1	0.192493
	SRSF9	Q13242	PRP4	O43172	169	26		1	0.228275
			SRSF1	Q07955	169	165		1	0.187351
	SUGP1	Q8IWZ8	MSTMBPMS2nc_Recombinant	P0AEX9-r	13	116		1	0.214923
	SYF1	Q9HCS7	CCD12	Q8WUD4	532	34		1	0.185714
						42	1	2	0.909995
					593	87	4	4	4.21227
						94	2	3	2.9688
			CDC5L	Q99459	532	522	5	8	3.57625
					654	290	12	14	1.39171
						294	31	32	7.23826
			ISY1	Q9ULR0	257	138	1	2	1.06764
			PPIL2	Q13356	532	508		2	0.347111
						509	1	2	0.439459
			PRCC	Q92733	458	193	3	3	0.836625
			RU2A	P09661	2	205	2	2	0.63087
			SF3A1	Q15459	76	2		1	0.285025
					549	55	2	2	0.87631
					708	2	2	2	0.7547
			SNW1	Q13573	420	23		1	0.360486
			SYF2	O95926	794	49	2	2	1.29952
	SYF2	O95926	CRNL1	Q9BZJ0	140	381	7	13	1.47817
						388	6	8	1.68163
			MSTMBPMS2nc_Recombinant	P0AEX9-r	192	43		1	0.316384
			PRP8	Q6P2Q9	192	796		1	0.215804
			SYF1	Q9HCS7	49	794	2	2	1.29952
	TBB2B	Q9BVA1	NADAP	Q9BWU0	58	495	1	1	0.455802
	TBB4A	P04350	RED	Q13123	324	137		1	0.274807
			SF3B1	O75533	379	729		1	0.319421
	TCRG1	O14776	BUD31	P41223	711	68	1	1	0.511023
			CCAR1	Q8IX12	495	606		1	0.236808
			DDX41	Q9UJV9	495	143		1	0.196212
			GPKOW	Q92917	794	2		1	0.228975
			MFAP1	P55081	885	415		1	0.236398
						418	1	1	0.481225
			NOSIP	Q9Y314	495	6	1	1	0.655047
			PININ	Q9H307	495	456		1	0.202986
			PRP6	O94906	1049	242	1	1	0.509824
			PRP8	Q6P2Q9	1024	1210	5	15	0.767877
			RBM25	P49756	634	449		1	0.187361
			ROA2	P22626	711	186		1	0.353068
			SF3B1	O75533	794	1		8	0.332202
			SMD1	P62314	722	86		1	0.316992
			SNR40	Q96DI7	444	275	1	1	0.917839
			SNUT1	O43290	1016	11	1	2	0.53413
					1035	129	7	8	3.5487
						133	1	1	0.450451
						170	3	6	1.52385
						175	82	118	3.069
			SRRT	Q9BXP5	816	476	1	1	0.465726
					820	476		1	0.201128
			SRSF1	Q07955	1016	179	1	1	0.430317
			SRSF7	Q16629	1016	70		1	0.192493
			U5S1	Q15029	992	963	7	9	1.31618
			WBP11	Q9Y2W2	522	169		1	0.208409
			ZCH18	Q86VM9	1011	622		1	0.321639
					1016	622	3	3	1.35877
	TFP11	Q9UBB9	DHX15	O43143	86	491		1	0.213323
			RBM39	Q14498	610	103		1	0.215467
			WBP11	Q9Y2W2	249	46	1	1	0.984765
						98	3	10	0.579928
	TOE1	Q96GM8	MSTMBPMS2nc_Recombinant	P0AEX9-r	367	291		1	0.309054
			RUXE	P62304	74	67	6	6	3.30271
	TRIR	Q9BQ61	SF3B1	O75533	106	1292		2	0.353878
					146	649	5	6	1.67699
			SF3B2	Q13435	106	486	6	6	1.96203
			SF3B3	Q15393	106	911	2	3	1.59748
					161	137		1	0.275391
			U520	O75643	1	974	1	2	0.484546
			YJU2	Q9BW85	137	44		1	0.384022
	TXN4A	P83876	PRP8	Q6P2Q9	40	674	2	2	0.649773
					51	774	1	1	1.23944
						1020	11	18	1.3809
					109	721	32	38	2.58044
						773	2	5	0.525597
						774	11	13	1.92651
						1020	15	17	3.57686
	U2AF1	Q01081	RS4X	P62701	15	10		1	0.195835
			U2AF2	P26368	13	15		1	0.219362
					15	15	3	4	0.717272
					23	15	3	4	0.666922
	U2AF2	P26368	CCAR1	Q8IX12	70	978		2	0.290633
			PHF5A	Q7RTV0	329	108		1	0.225717
			PRPF3	O43395	462	205	1	2	0.705519
			RSRC2	Q7L4I2	70	248		2	0.360847
			SF3B1	O75533	453	214	2	3	1.02516
					462	656	5	5	1.99617
			SF3B6	Q9Y3B4	329	41	1	2	0.47647
			SRSF1	Q07955	70	179	3	6	1.28466
			U2AF1	Q01081	15	13		1	0.219362
						15	3	4	0.717272
						23	3	4	0.666922
	U520	O75643	CCAR1	Q8IX12	155	808		1	0.217928
			CRNL1	Q9BZJ0	85	427		2	0.297972
			CWC27	Q6UX04	85	372		1	0.307158
					1146	162	1	1	0.68571
			MFAP1	P55081	1142	249	1	1	0.395198
						250	13	18	2.09949
						256		1	0.281855
					1146	250	1	3	0.784008
			NCBP2	P52298	85	120		1	0.279994
			PPIH	O43447	349	101	2	2	0.573063
					368	101	5	9	1.20204
					426	153	1	2	0.547481
			PPWD1	Q96BP3	103	293	1	3	0.598208
			PQBP1	O60828	14	116	1	1	0.803141
					46	2	1	1	0.642599
					60	18	3	4	0.729811
					85	2	11	11	3.87577
			PR38A	Q8NAV1	1116	92		1	0.267282
			PRP16	Q92620	177	523	1	1	0.896788
			PRP4	O43172	451	57	1	3	0.556593
					453	57	1	1	1.92545
					671	53	5	11	0.739451
					944	45	6	10	1.06063
						53	9	15	1.38519
					1556	15	7	7	6.30391
						26	11	11	2.69581
						27	4	4	1.74935
					1557	15	3	3	4.95544
						26	2	3	1.08558
					1567	15	14	16	2.83443
					1595	15	9	9	2.61922
						26	1	4	0.483489
						27	1	1	0.518169
					1603	15	22	27	2.08868
					1610	15	5	5	3.23976
					1874	15	13	16	1.44323
			PRP4B	Q13523	103	211		1	0.321057
			PRP6	O94906	103	395	1	1	0.607674
					426	395	1	1	0.640883
					695	395	6	6	0.986358
			PRP8	Q6P2Q9	60	2049		1	0.221443
					73	1994	1	2	0.390054
					85	43		1	0.188345
					729	2034	1	1	0.606984
						2049	3	6	0.936492
					733	2034		1	0.264866
					770	2049	1	2	1.01571
					1006	2112	1	3	0.773777
					1039	2049	2	4	0.888711
						2070	1	1	0.698941
			PRPF3	O43395	440	458		5	0.207402
					451	458		1	0.252514
					695	495	5	7	0.696306
			R113A	O15541	770	319	1	3	0.493464
			ROA1	P09651	85	105		1	0.201599
					451	350		1	0.349048
					479	78	3	4	1.66626
						350	6	7	0.894336
					557	350	2	3	1.61023
					944	350		2	0.239742
			RSMB	P14678	469	88	3	3	1.1684
			SMD1	P62314	1874	41	4	10	0.753805
						44	1	2	0.437435
					1883	86	7	11	2.66436
						88		4	0.347775
			SMU1	Q2TAY7	349	485	1	1	0.434617
					971	308	30	44	2.14917
					974	308	1	1	0.419903
					975	214	1	1	0.579493
						308	28	30	4.59463
					1544	308	4	5	0.64751
					1552	308	56	91	2.97404
					1711	308	1	1	1.64378
					1715	308	15	20	1.8146
			SNUT1	O43290	349	749		1	0.291517
					1006	310	1	1	0.479647
					1049	308		1	0.225518
						309	4	5	1.93536
						310	1	1	1.41768
					1556	454	10	14	1.29368
					1557	454	1	3	0.585066
					2072	524	4	5	1.40995
						530	3	3	1.0356
						531	9	10	1.33863
						657	3	8	1.5925
						662	6	9	1.28119
			SPF30	O75940	85	138		1	0.199751
						142	1	1	0.421054
			SPF45	Q96I25	1977	129		2	0.264401
			SR140	O15042	1145	591	2	2	0.519082
			SRRT	Q9BXP5	1025	712		1	0.189858
			SRSF4	Q08170	85	313		1	0.191539
			TRIR	Q9BQ61	974	1	1	2	0.484546
			U520	O75643	469	469		4	0.313323
					745	745		2	0.306385
			WBP11	Q9Y2W2	55	322		1	0.194504
					85	48		3	0.321283
					1141	31		1	0.198575
			WBP4	O75554	733	11	2	2	1.76578
					770	37	1	2	0.893586
					1567	334	1	2	0.40674
					1603	340	5	6	1.72413
					1874	334	2	7	1.10928
						338	2	5	1.10156
			ZMAT2	Q96NC0	85	23		1	0.214437
					479	8	17	23	1.72383
					557	8	31	49	4.28903
						15	25	28	2.08269
					729	70	4	5	0.653995
					733	70		1	0.355147
					804	15		1	0.255119
					1134	8	5	10	1.91298
					1141	64		3	0.305713
					1145	64	9	12	1.60815
	U5S1	Q15029	DDX42	Q86XP3	673	568		1	0.226222
			K1C9	P35527	341	396		1	0.184986
			KIN17	O60870	341	10		1	0.215826
			MFAP1	P55081	359	434		1	0.205522
			PNISR	Q8TF01	951	242	4	5	1.22287
			PRP8	Q6P2Q9	359	366	26	37	1.94492
					405	218	5	8	1.32373
					409	218	1	6	0.417567
					673	1859		1	0.2983
			RSMB	P14678	98	88	1	1	0.85881
			SMD2	P62316	352	6	2	3	0.654627
			TCRG1	O14776	963	992	7	9	1.31618
	UBL5	Q9BZL1	PAXB1	Q9Y5B6	12	137	1	1	0.664692
			SNUT1	O43290	1	147	26	28	2.87473
					29	129	1	5	0.905386
						133		1	0.19664
	WBP11	Q9Y2W2	LSM7	Q9UK45	565	21		2	0.35293
			PAXB1	Q9Y5B6	98	99		1	0.216408
			SF3A1	Q15459	117	259		1	0.318144
					557	2	2	3	1.39414
					590	2		1	0.217375
						115	2	2	1.07925
						131	2	2	0.45377
					599	2	1	1	0.547955
						115		1	0.361433
					610	2		2	0.30877
						115	3	4	0.701573
						131		1	0.22365
					614	2	3	3	0.873476
						102		2	0.263507
						115	3	4	1.1862
						131	2	6	0.801703
					626	2	3	3	0.517803
						115	4	4	0.6464
			SF3A2	Q15428	556	118	6	15	0.652472
					557	118	8	13	0.856484
					565	118		9	0.370555
			SNR40	Q96DI7	98	349	1	3	0.640601
					169	275	2	2	1.6279
			TCRG1	O14776	169	522		1	0.208409
			TFP11	Q9UBB9	46	249	1	1	0.984765
					98	249	3	10	0.579928
			U520	O75643	31	1141		1	0.198575
					48	85		3	0.321283
					322	55		1	0.194504
	WBP4	O75554	PPIH	O43447	56	164	1	3	0.502963
						166	2	3	0.63762
					60	164	2	3	0.691826
						166	8	15	0.592745
					63	164	8	9	3.80542
						166	12	14	2.46223
			PRP4	O43172	334	15		1	0.274952
					338	15	1	3	0.386273
			PRP8	Q6P2Q9	6	2031	14	16	3.92121
						2034	17	25	2.37491
			U520	O75643	11	733	2	2	1.76578
					37	770	1	2	0.893586
					334	1567	1	2	0.40674
						1874	2	7	1.10928
					338	1874	2	5	1.10156
					340	1603	5	6	1.72413
			ZMAT2	Q96NC0	2	147		2	0.260217
					37	70		1	0.216136
	WDR70	Q9NW82	PRP17	O60508	509	440	7	9	1.38197
	YBOX1	P67809	SNR40	Q96DI7	58	18		1	0.258468
	YJU2	Q9BW85	SF3B1	O75533	55	214	1	1	0.967613
			TRIR	Q9BQ61	44	137		1	0.384022
	ZCH18	Q86VM9	NCBP1	Q09161	319	221	5	5	0.964553
					328	241	1	2	0.88021
					343	41	3	3	0.459778
			PRP4B	Q13523	933	99	1	1	0.494341
					936	117	11	11	2.87116
					948	99	11	12	1.68065
					952	99	21	28	1.82464
			PRP6	O94906	771	540		1	0.194176
			PRP8	Q6P2Q9	510	366	2	3	0.460887
			SR140	O15042	480	993	2	2	0.748236
			SRRT	Q9BXP5	188	730	4	9	1.65328
						744		6	0.385173
					211	721		1	0.301813
					217	721	4	7	1.08528
					229	442	8	14	1.95597
						687	16	19	3.16705
						744		2	0.29403
			TCRG1	O14776	622	1011		1	0.321639
						1016	3	3	1.35877
	ZMAT2	Q96NC0	MFAP1	P55081	132	256	7	9	2.45367
					136	256	1	1	0.576594
					138	256		1	0.196514
			PQBP1	O60828	36	228	1	1	0.525801
					39	228	4	5	1.2705
			PR38A	Q8NAV1	45	7	15	25	2.20225
[truncated: 5,103 more rows]

## Sheet: Dataset EV1 Legend
Dataset EV1. Protein-protein crosslinks identified in human B complexes. Crosslinks identified by pLink2.3.9 and filtered at FDR 1 and 5% are shown. The number of CSMs (crosslinked peptide spectrum matches) and the highest score are indicated for each crosslinked peptide. “Inter" and “Intra” indicate inter-protein and intra-protein crosslinks, respectively. "Residue 1" and "Residue 2" are the cro…
Dataset EV1. Protein-protein crosslinks identified in human B complexes. Crosslinks identified by pLink2.3.9 and filtered at FDR 1 and 5% are shown. The number of CSMs (crosslinked peptide spectrum matches) and the highest score are indicated for each crosslinked peptide. “Inter" and “Intra” indicate inter-protein and intra-protein crosslinks, respectively. "Residue 1" and "Residue 2" are the cro…
